# Supplementary material for: Synthesis of stable class 5 mesoionic benzo[c]tetrazolo[2,3-a]cinnolinium thiolate, dicyanomethylide, and amides
Source: Royal Society of Chemistry journal article supplement (doi:10.1039/d3ob00362k), 2023-01-01
Supplement: d3ob00362k1.pdf [file d3ob00362k1.pdf]

## Supporting Information

### Contents

|                                                                                                                        |    |
|------------------------------------------------------------------------------------------------------------------------|----|
| <b>Table S1.</b> Summary of $^1\text{H}$ NMR chemical shift for compounds <b>2–6</b> .                                 | 2  |
| <b>Table S2.</b> Summary of $^{13}\text{C}$ NMR chemical shift for compounds <b>1–6</b> .                              | 2  |
| <b>Figure S1.</b> Single crystal X-ray structure analysis of BTC thiolate <b>3</b> .                                   | 3  |
| <b>Table S3.</b> Deviation of the atoms from the plane.                                                                | 5  |
| <b>Figure S2.</b> The thermogravimetry analysis and differential thermal analysis.                                     | 6  |
| <b>Table S4.</b> Selected optimized geometry and vibration frequency of BTC-S <b>3</b> .                               | 7  |
| <b>Figure S3.</b> Experimental and calculated IR spectra of BTC-S <b>3</b> .                                           | 8  |
| <b>Table S5.</b> The Gibbs free energies of restrict or unstrict calculation geometry of BTC-S <b>3</b> .              | 9  |
| <b>Figure S4.</b> DFT calculated energy plot of BTC-S <b>3</b> .                                                       | 10 |
| <b>Figure S5.</b> TD-DFT calculated spectra of BTC-S <b>3</b> .                                                        | 11 |
| <b>Table S6.</b> Aromaticity indexes of class 5 mesoionic BTC <b>3</b> and dehydrodithizone.                           | 12 |
| <b>Figure S6.</b> Calculation of bond index by NBO analysis.                                                           | 12 |
| <b>Table S7.</b> The calculation Mulliken atomic charge and NBO natural charge.                                        | 13 |
| <b>Figure S7.</b> UV spectra for <b>5•H<sup>+</sup></b> /acetonitrile solution.                                        | 14 |
| <b>Figure S8.</b> UV spectra for <b>6•H<sup>+</sup></b> /acetonitrile solution.                                        | 15 |
| <b>Figure S9.</b> $^1\text{H}$ NMR of BTC-NH <sup>n</sup> Bu <b>6</b> with acid and base in $\text{CD}_2\text{Cl}_2$ . | 15 |
| <b>Figure S10.</b> IR spectra of BTC <b>2–6</b> using KBr.                                                             | 16 |
| <b>Figure S11.</b> $^1\text{H}$ NMR spectra of BTC <b>2–6</b> .                                                        | 19 |
| <b>Figure S12.</b> $^{13}\text{C}$ NMR spectra of BTC <b>2–6</b> .                                                     | 22 |
| <b>Figure S13.</b> MS of BTC <b>2-6</b> using ESI-TOF positive mode.                                                   | 25 |
| <b>Table S8.</b> The calculation of optimized geometry of BTC-S <b>3</b> in gas phase.                                 | 28 |
| <b>Table S9.</b> The calculation of optimized geometry of BTC-S <b>3</b> in chloroform IEF-PCM.                        | 32 |
| <b>Table S10.</b> The calculation of optimized geometry of dehydrodithizone ( <b>DD</b> ) in gas phase.                | 36 |
| <b>Figure S14.</b> UV-Vis spectra and calibration curve of <b>5•H<sup>+</sup></b> .                                    | 37 |
| <b>Figure S15.</b> UV-Vis spectra and calibration curve of <b>6•H<sup>+</sup></b> .                                    | 38 |

**Table S1.** Summary of <sup>1</sup>H NMR chemical shift for compounds

| Compounds | Solvent                     | <sup>1</sup> H NMR chemical shift [ppm] |           |           |           | Other                                                         |
|-----------|-----------------------------|-----------------------------------------|-----------|-----------|-----------|---------------------------------------------------------------|
|           |                             | Benzocinnoline ring                     |           |           |           |                                                               |
| <b>2</b>  | CD <sub>3</sub> CN          | 8.22–8.25                               | 8.30–8.32 | 8.78–8.80 | 8.98–9.00 |                                                               |
| <b>3</b>  | DMSO- <i>d</i> <sub>6</sub> | 8.00–8.05 (4H)                          |           | 8.49–8.52 | 8.93–8.95 |                                                               |
| <b>4</b>  | DMSO- <i>d</i> <sub>6</sub> | 8.07–8.16 (4H)                          |           | 8.55–8.57 | 9.03–9.06 |                                                               |
| <b>5</b>  | CD <sub>3</sub> CN          | 8.10–8.13                               | 8.14–8.18 | 8.57–8.59 | 8.85–8.87 | 6.57 (NH <sub>2</sub> )                                       |
| <b>6</b>  | CD <sub>3</sub> CN          | 8.09–8.17 (4H)                          |           | 8.58–8.60 | 8.85–8.87 | 1.00, 1.49,<br>1.75, 3.59<br>( <sup>n</sup> Bu), 6.82<br>(NH) |

Referenced by solvent residual signal (DMSO-*d*<sub>6</sub>: 2.05 ppm, CD<sub>3</sub>CN: 1.94 ppm)

**Table S2.** Summary of <sup>13</sup>C NMR chemical shift for compounds

| Compounds                      | Solvent                     | <sup>13</sup> C NMR chemical shift [ppm]                |              |                                                  |
|--------------------------------|-----------------------------|---------------------------------------------------------|--------------|--------------------------------------------------|
|                                |                             | Benzocinnoline ring (6C)                                | Tetrazolo C* | Others                                           |
| <b>2</b>                       | CD <sub>3</sub> CN          | 119.45, 123.66, 126.01, 129.49, 134.59, 136.07          | 158.38       |                                                  |
| <b>3</b>                       | DMSO- <i>d</i> <sub>6</sub> | 117.76, 121.20, 124.26, 128.05, 131.34, 131.74          | 181.28       |                                                  |
| <b>4</b>                       | DMSO- <i>d</i> <sub>6</sub> | 117.92, 119.78, 121.55, 124.49, 128.36, 132.33          | 168.41       | 23.78 (methylidene)                              |
| <b>5</b>                       | CD <sub>3</sub> CN          | 118.88, 122.75, 125.58, 129.33, 133.75, 134.16          | 165.94       |                                                  |
| <b>6</b>                       | CD <sub>3</sub> CN          | 118.89, 122.74, 125.58, 129.42, 133.73, 134.07          | 166.24       | 13.98, 20.53, 31.60,<br>43.93 ( <sup>n</sup> Bu) |
| <b>Type B Cl 1</b>             | CD <sub>3</sub> CN          | 126.88, 131.84, 133.60, 135.90                          | 158.69       |                                                  |
| <b>Type B S<sup>a</sup></b>    | DMSO- <i>d</i> <sub>6</sub> | 126.3, 129.6, 132.5, 133.4                              | 181.4        |                                                  |
| <b>Type B dicyanomethylide</b> | DMSO- <i>d</i> <sub>6</sub> | 126.2 (meta), 129.9 (ortho), 133.1 (para), 133.2 (ipso) | 169.2        | 22.4, 119.6 (CN)                                 |

Referenced by solvent signal (DMSO-*d*<sub>6</sub>: 39.52 ppm, CD<sub>3</sub>CN: 1.32 ppm). a) W. Koźmiński, J. Jaźwiński, L. Stefaniak, *J. Mol. Struct.* **1993**, 295, 15. b) S. Araki, J. Mizuya, Y. Butsugan, *J. Chem. Soc. Perkin T. 1*, **1985**, 2439.

**Figure S1.** Single crystal X-ray structure analysis of BTC thiolate **3**

CCDC deposit number: 2131771

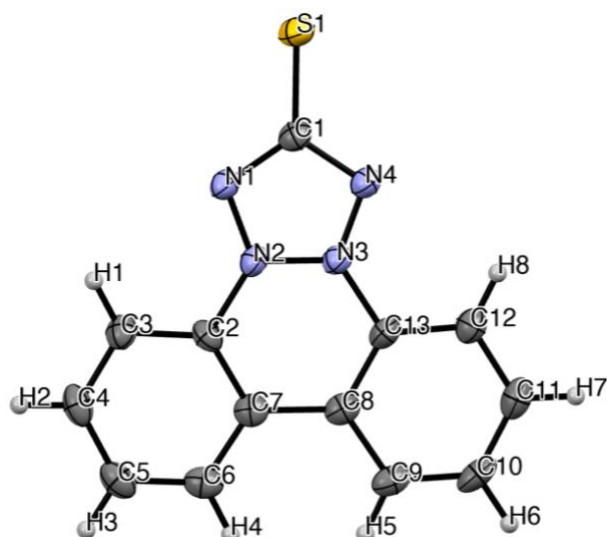

|                                  |                                                                                       |
|----------------------------------|---------------------------------------------------------------------------------------|
| Empirical Formula                | C <sub>13</sub> H <sub>8</sub> N <sub>4</sub> S                                       |
| Formula Weight                   | 252.29                                                                                |
| Crystal System                   | orthorhombic                                                                          |
| Lattice Type                     | Primitive                                                                             |
| Lattice Parameters               | a = 9.3963(7) Å<br>b = 9.7124(9) Å<br>c = 12.071(1) Å<br>V = 1101.6(2) Å <sup>3</sup> |
| Space Group                      | Pna2 <sub>1</sub> (#33)                                                               |
| Z value                          | 4                                                                                     |
| D <sub>calc</sub>                | 1.521 g/cm <sup>3</sup>                                                               |
| Temperature                      | -100.0°C                                                                              |
| No. of Reflections Measured      | Total: 9761<br>Unique: 2475 (R <sub>int</sub> = 0.0945)<br>Friedel pairs: 1152        |
| Residuals: R1 (I>2.00σ(I))       | 0.0374                                                                                |
| Residuals: R (All reflections)   | 0.0645                                                                                |
| Residuals: wR2 (All reflections) | 0.0653                                                                                |

| atom | Atomic coordinate |            |            | B <sub>eq</sub> |
|------|-------------------|------------|------------|-----------------|
|      | x                 | y          | z          |                 |
| S1   | -0.1916(1)        | 0.07721(9) | 0.68974(9) | 2.50(2)         |
| N1   | 0.0149(4)         | 0.1605(3)  | 0.8322(2)  | 2.04(6)         |
| N2   | 0.0563(3)         | 0.2807(3)  | 0.8719(3)  | 1.96(6)         |
| N3   | -0.0189(3)        | 0.3828(3)  | 0.8253(2)  | 1.93(6)         |
| N4   | -0.1129(3)        | 0.3323(3)  | 0.7545(3)  | 2.15(6)         |
| C1   | -0.0921(4)        | 0.1929(4)  | 0.7603(3)  | 2.10(7)         |

|     |            |           |           |         |
|-----|------------|-----------|-----------|---------|
| C2  | 0.1627(4)  | 0.3066(4) | 0.9518(3) | 2.05(7) |
| C3  | 0.2344(4)  | 0.1951(4) | 0.9979(3) | 2.31(7) |
| C4  | 0.3386(4)  | 0.2227(4) | 1.0739(3) | 2.57(8) |
| C5  | 0.3731(4)  | 0.3567(4) | 1.1020(3) | 2.65(8) |
| C6  | 0.2988(4)  | 0.4658(4) | 1.0569(3) | 2.41(7) |
| C7  | 0.1891(4)  | 0.4433(4) | 0.9815(3) | 2.03(6) |
| C8  | 0.1023(4)  | 0.5535(4) | 0.9338(3) | 2.08(7) |
| C9  | 0.1147(4)  | 0.6914(4) | 0.9640(3) | 2.39(7) |
| C10 | 0.0292(5)  | 0.7899(4) | 0.9154(3) | 2.70(8) |
| C11 | -0.0722(4) | 0.7547(4) | 0.8383(3) | 2.63(7) |
| C12 | -0.0903(4) | 0.6193(4) | 0.8069(3) | 2.40(7) |
| C13 | -0.0025(4) | 0.5218(4) | 0.8561(3) | 1.97(6) |

| atom | Atomic coordinate |        |        | B <sub>iso</sub> |
|------|-------------------|--------|--------|------------------|
|      | x                 | y      | z      |                  |
| H1   | 0.2118            | 0.1032 | 0.9774 | 2.77             |
| H2   | 0.3880            | 0.1486 | 1.1079 | 3.08             |
| H3   | 0.4485            | 0.3737 | 1.1527 | 3.17             |
| H4   | 0.3227            | 0.5572 | 1.0777 | 2.89             |
| H5   | 0.1824            | 0.7178 | 1.0185 | 2.86             |
| H6   | 0.0406            | 0.8838 | 0.9356 | 3.24             |
| H7   | -0.1303           | 0.8243 | 0.8064 | 3.16             |
| H8   | -0.1601           | 0.5937 | 0.7538 | 2.88             |

**Table S3.** Deviation of the atoms from the plane

Standard plane equation was calculated from X-ray diffraction geometry [angstrom] without hydrogen atoms by singular value decomposition using Numpy (v.1.20.2)<sup>a</sup> at Python (v.3.9.2).

plane equation:

$$-0.666x - 0.096y + 0.740z - 7.20 = 0$$

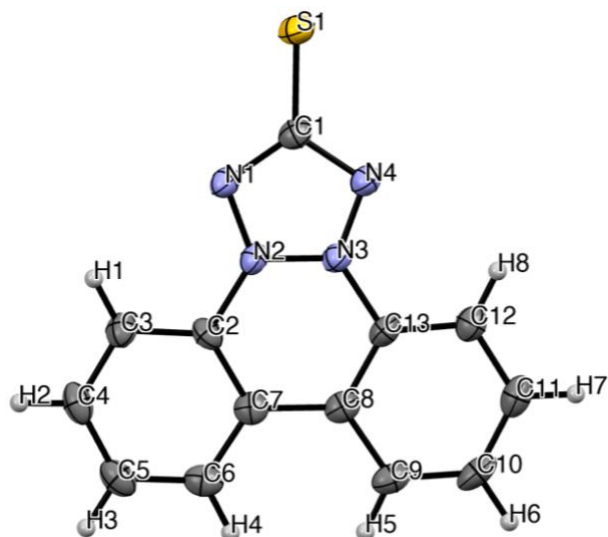

| atom | Deviation of the atoms from the plane [Å] |
|------|-------------------------------------------|
| S1   | 0.086                                     |
| N1   | -0.011                                    |
| N2   | -0.027                                    |
| N3   | -0.068                                    |
| N4   | -0.065                                    |
| C1   | -0.014                                    |
| C2   | -0.003                                    |
| C3   | 0.064                                     |
| C4   | 0.065                                     |
| C5   | -0.025                                    |
| C6   | -0.064                                    |
| C7   | -0.031                                    |
| C8   | -0.016                                    |
| C9   | 0.048                                     |
| C10  | 0.057                                     |
| C11  | 0.035                                     |
| C12  | -0.006                                    |
| C13  | -0.025                                    |

- a) C. R. Harris, K. J. Millman, S. J. van der Walt, R. Gommers, P. Virtanen, D. Cournapeau, E. Wieser, J. Taylor, S. Berg, N. J. Smith, R. Kern, M. Picus, S. Hoyer, M. H. van Kerkwijk, M. Brett, A. Haldane, J. F. del Tio, M. Wiebe, P. Peterson, P. G-Marchant, K. Sheppard, T. Reddy, W. Weckesser, H. Abbasi, C. Gohlke, T. E. Oliphant, *Nature*, **2020**, 585, 357.

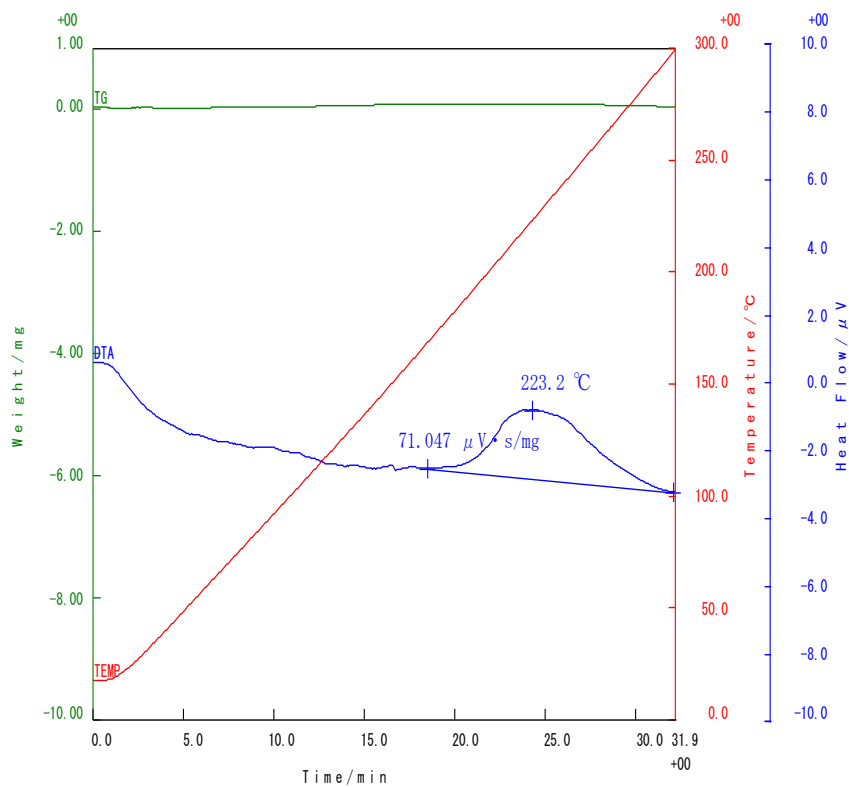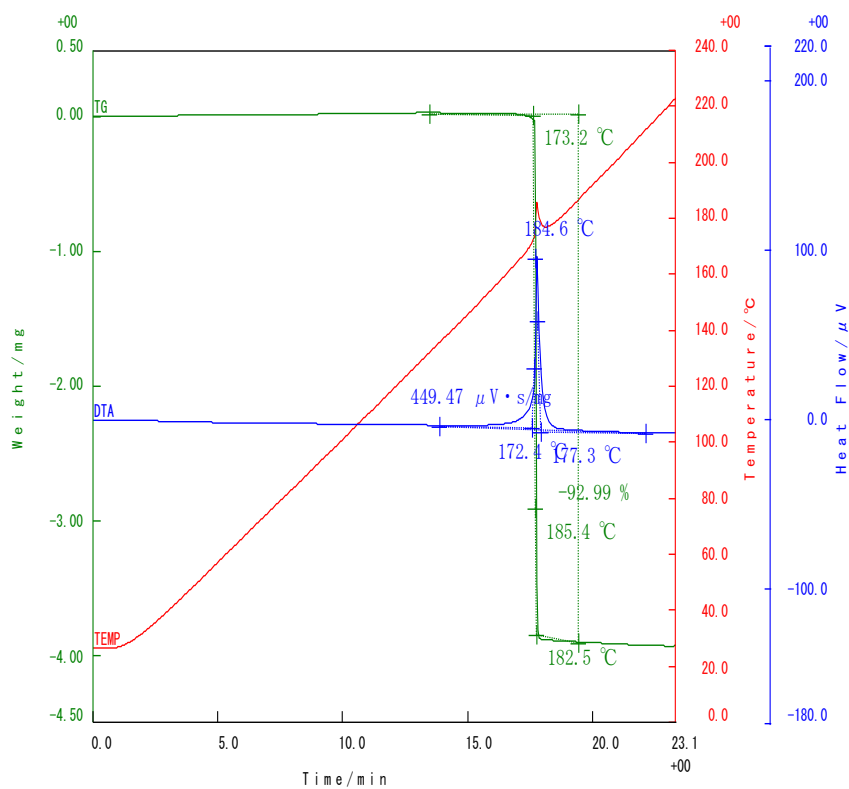

**Figure S2.** The thermogravimetry analysis and differential thermal analysis of BTC thiolate **3** (upper) and dehydrodithizone (**DD**).

**Table S4.** Selected optimized geometry and vibration frequency of BTC-S 3

| Functionals | Phase      | Bond length [ $\text{\AA}$ ] |                       |                       |           |                                          |                                  | Vibration frequency [ $\text{cm}^{-1}$ ] |              |
|-------------|------------|------------------------------|-----------------------|-----------------------|-----------|------------------------------------------|----------------------------------|------------------------------------------|--------------|
|             |            | C1-S                         | C1-N1 (C1-N4)         | N1-N2 (N3-N4)         | N2-N3     | N2-C <sub>Ph</sub> (N3-C <sub>Ph</sub> ) | C <sub>Ph</sub> -C <sub>Ph</sub> | C-S stretching                           | Ph-H bending |
| B3LYP       | Vacuum     | 1.6679                       | 1.3937 (1.3936)       | 1.3081(1.3082)        | 1.3526    | 1.4016 (1.4015)                          | 1.4589                           | 1293                                     | 769          |
|             | chloroform | 1.6950                       | 1.3767 (1.3767)       | 1.3137 (1.3137)       | 1.3447    | 1.4032 (1.4032)                          | 1.4586                           | 1270, 1287                               | 770          |
| M06-2X      | Vacuum     | 1.6662                       | 1.3853 (1.3854)       | 1.2997 (1.2996)       | 1.3312    | 1.4044 (1.4045)                          | 1.4612                           | 1312, 1356                               | 780          |
|             | chloroform | 1.6946                       | 1.3690 (1.3690)       | 1.3036 (1.3036)       | 1.3254    | 1.4069 (1.4069)                          | 1.4609                           | 1317, 1360                               | 778          |
| CAM-B3LYP   | Vacuum     | 1.6650                       | 1.3828 (1.3826)       | 1.3006 (1.3007)       | 1.3327    | 1.4029 (1.4028)                          | 1.4604                           | 1316, 1354                               | 785          |
|             | chloroform | 1.6932                       | 1.3662 (1.3662)       | 1.3048 (1.3048)       | 1.3270    | 1.4049 (1.4049)                          | 1.4595                           | 1314, 1356                               | 784          |
| wB97X-D     | Vacuum     | 1.6655                       | 1.3845 (1.3843)       | 1.3009 (1.3010)       | 1.3321    | 1.4027 (1.4027)                          | 1.4618                           | 1323, 1358                               | 774          |
|             | chloroform | 1.6930                       | 1.3680 (1.3680)       | 1.3048 (1.3048)       | 1.3266    | 1.4046 (1.4046)                          | 1.4609                           | 1318, 1359                               | 773          |
| Experiment  | -          | 1.692(4)                     | 1.365 (5) (1.370 (5)) | 1.321 (4) (1.323 (4)) | 1.342 (4) | 1.411 (5) (1.408 (4))                    | 1.464 (5)                        | 1273, 1290                               | 767          |

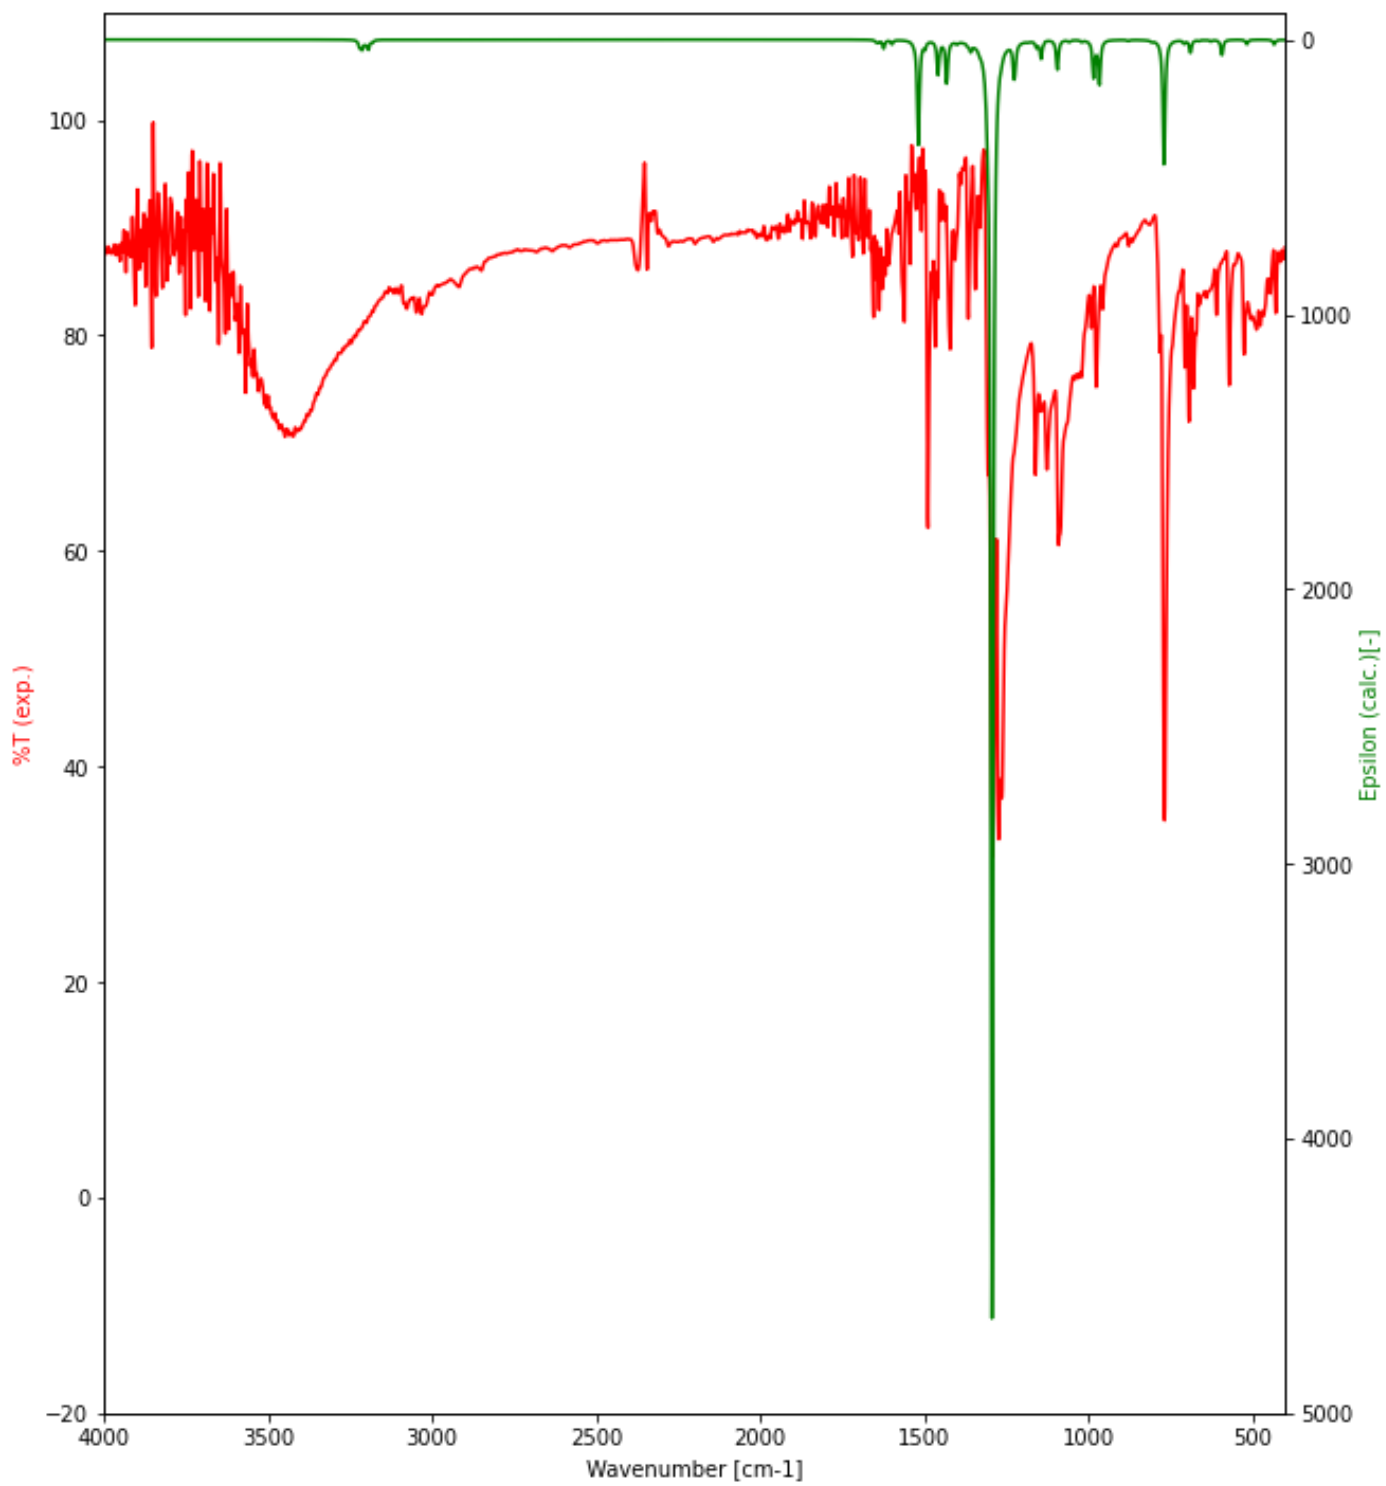

**Figure S3.** Experimental (red, using KBr) and calculated (green, at the B3LYP/6-311++G(d,p) level) IR spectra of BTC-S 3.



**Table S5.** The Gibbs free energies of restrict or unstrict calculation geometry of BTC-S 3.

| Symmetry                  | Gibbs free energy |
|---------------------------|-------------------|
| C <sub>1</sub> [Hartree]  | -1117.371884      |
| C <sub>2v</sub> [Hartree] | -1117.371237      |
| Delta [Hartree]           | -0.000674         |
| Delta [kcal/mol]          | -0.405            |

Calculated at the B3LYP/6-311++G(d,p) level. T = 298.150.

| Functional theory | Energy level [Hartree] |          |          |          |          |
|-------------------|------------------------|----------|----------|----------|----------|
|                   | LUMO(+1)               | LUMO     | HOMO     | HOMO(-1) | HOMO(-2) |
| B3LYP             | -0.09514               | -0.11323 | -0.18597 | -0.18742 | -0.27698 |
| M06-2X            | -0.06528               | -0.07871 | -0.22657 | -0.23417 | -0.32428 |
| CAM-C3LYP         | -0.05331               | -0.07074 | -0.23273 | -0.23807 | -0.32738 |
| $\omega$ B97X-D   | -0.03057               | -0.04777 | -0.25333 | -0.25824 | -0.34715 |

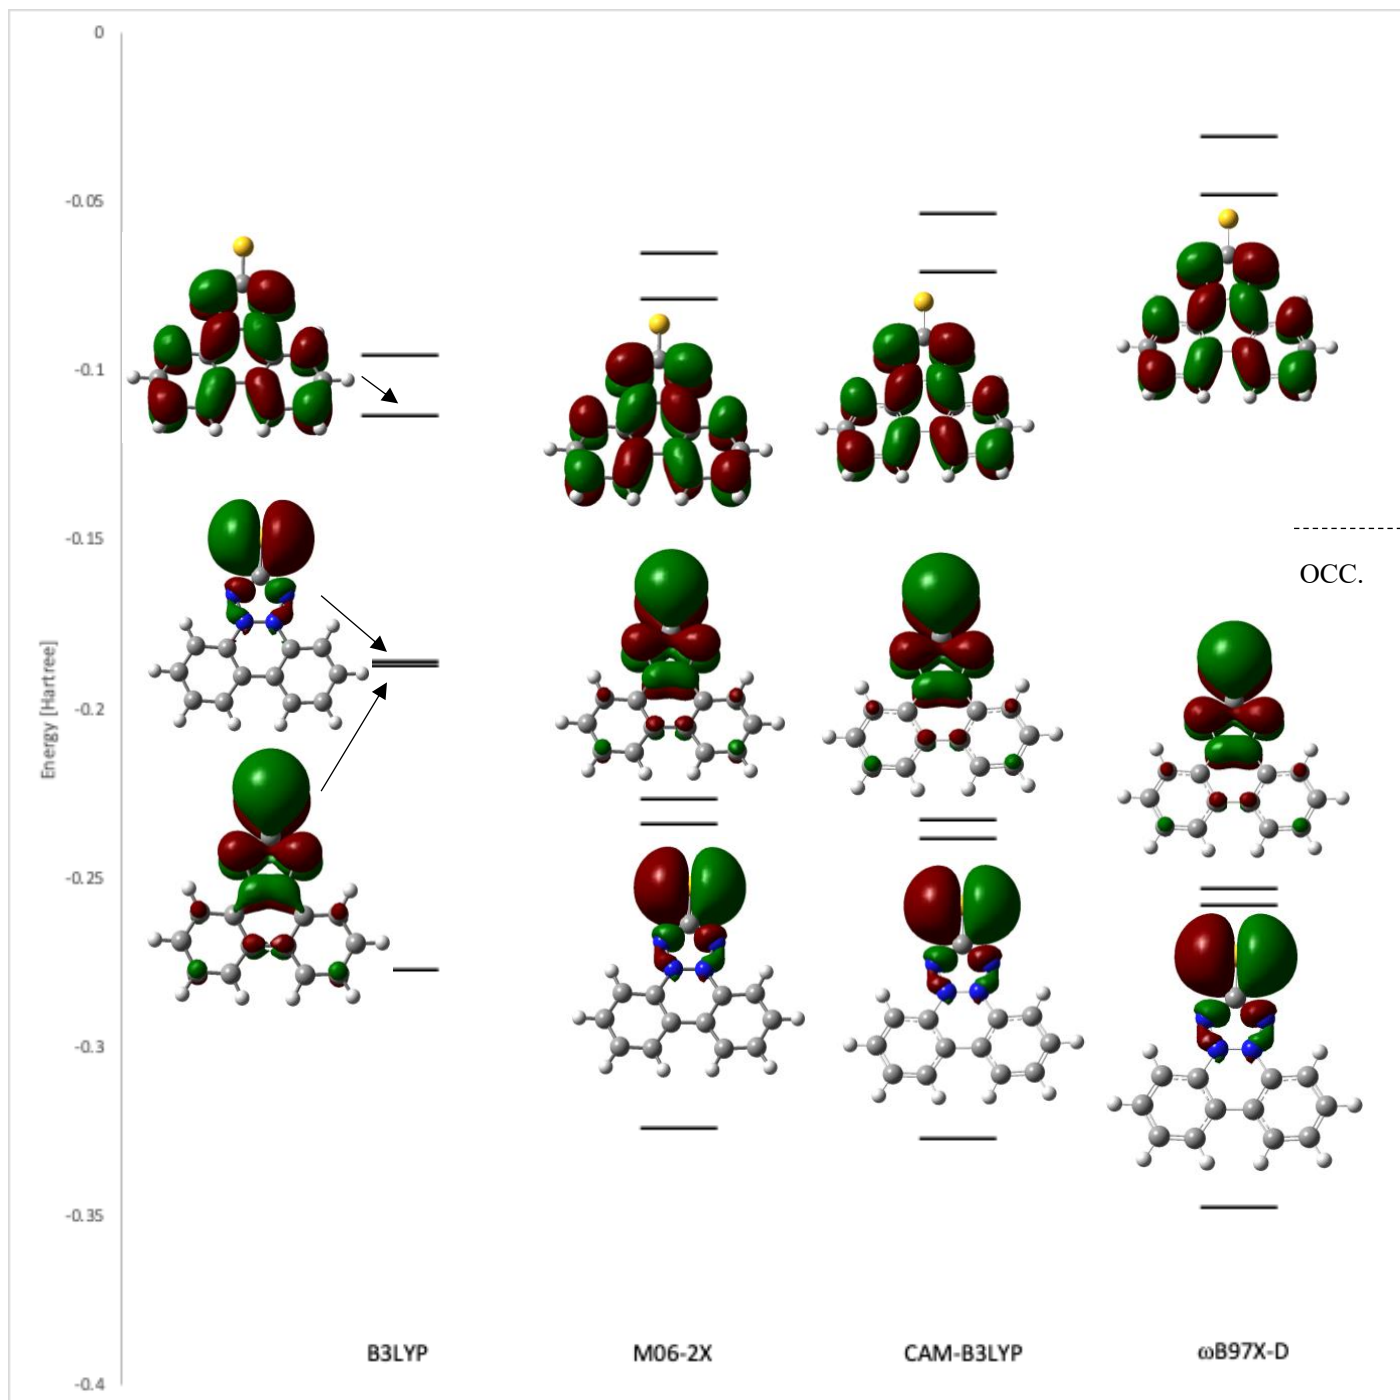

**Figure S4.** DFT calculated energy plot of BTC-S 3 with 6-311++(d,p) basis set and molecular orbital at LUMO, HOMO and HOMO (-1) (isovalue = 0.002).

| Entry | Functionals | Wavelength [nm <sup>-1</sup> ] (Oscillator strength [-]) |                 |                 |                 |                 |
|-------|-------------|----------------------------------------------------------|-----------------|-----------------|-----------------|-----------------|
|       |             | S <sub>1</sub>                                           | S <sub>2</sub>  | S <sub>3</sub>  | S <sub>4</sub>  | S <sub>5</sub>  |
| 1     | B3LYP       | 640.45 (0.0001)                                          | 613.93 (0.0219) | 436.78 (0.0226) | 343.35 (0.0154) | 333.77 (0.3049) |
| 2     | M06-2X      | 454.72 (0.0406)                                          | 418.77 (0.0003) | 321.28 (0.0230) | 287.30 (0.3951) | 269.44 (0.3581) |
| 3     | CAM-B3LYP   | 459.43 (0.0374)                                          | 427.44 (0.0002) | 312.10 (0.0034) | 261.53 (0.4243) | 288.85 (0.4847) |
| 4     | ωB97X-D     | 444.17 (0.0393)                                          | 413.73 (0.0003) | 303.95 (0.0481) | 277.88 (0.6124) | 253.76 (0.4276) |
| 5     | Experiment  | 488, 377, 361, 334, 320                                  |                 |                 |                 |                 |

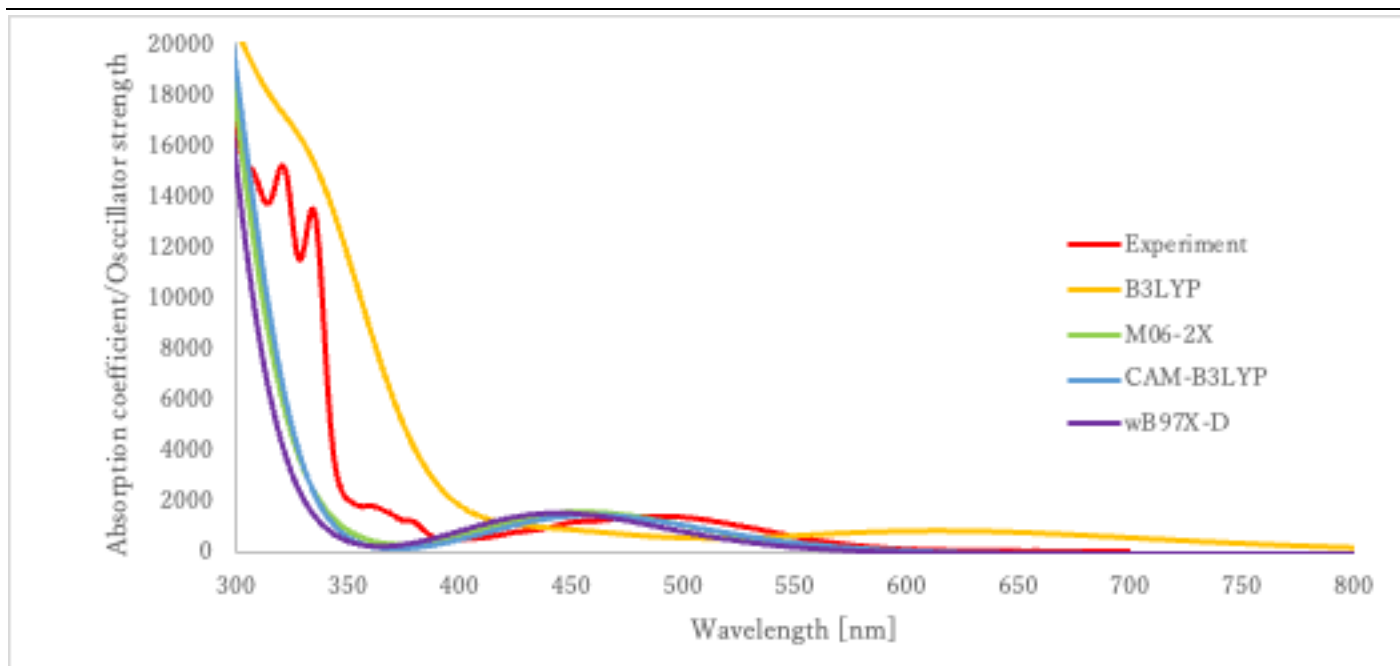

**Figure S5.** TD-DFT calculated spectra at B3LYP (yellow), M06-2X (green), CAM-B3LYP (blue) and ωB97X-D (purple) functionals with 6-311++G(d,p) basis set and experimental spectra (red) of BTC-S **3** in chloroform.

**Table S6.** Aromaticity indexes of class 5 mesoionic BTC **3** and dehydrodithizone.

| Molecule         | Ring | NICS(1) <sub>zz</sub> <sup>a</sup> | Bird I (calculated     | Bird I (single crystal |
|------------------|------|------------------------------------|------------------------|------------------------|
|                  |      |                                    | geometry) <sup>a</sup> | X-ray diffraction)     |
| BTC-S <b>3</b>   | A    | -10.1569                           | 71                     | 88                     |
|                  | B    | -5.3428                            | 62                     | 60                     |
|                  | C    | -24.9640                           | 91                     | 92                     |
|                  | C'   | -24.9654                           | 91                     | 94                     |
| dehydrodithizone | A    | -11.4249                           | 73                     | 88 <sup>b</sup>        |

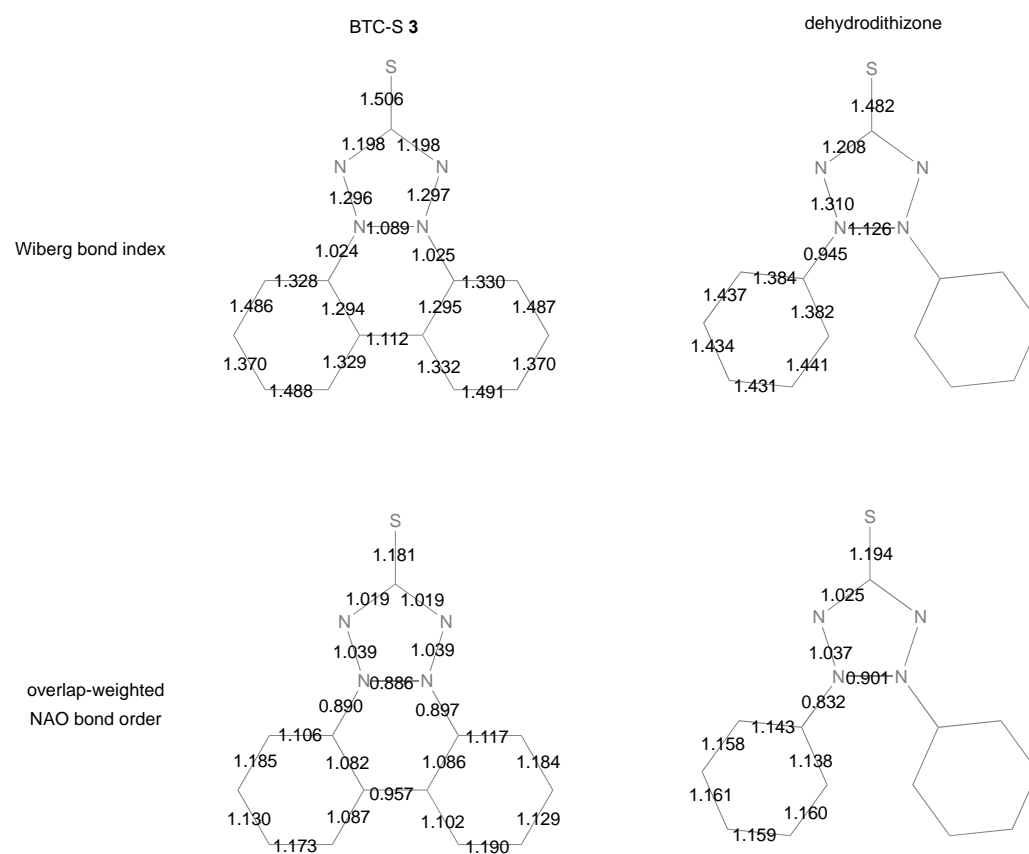

**Figure S6.** Calculation of bond index by NBO analysis at the B3LYP/6-311++G(d,p) level.

**Table S7.** The calculation Mulliken atomic charge and NBO natural charge at the B3LYP/6-311++G(d,p) level.

| Atom | BTC-S 3         |                           | dehydrodithizone |                           |
|------|-----------------|---------------------------|------------------|---------------------------|
|      | Mulliken charge | atomic NBO natural charge | Mulliken charge  | atomic NBO natural charge |
| S1   | -0.54           | -0.22                     | -0.64            | -0.25                     |
| N1   | 0.10            | -0.27                     | 0.06             | -0.25                     |
| N2   | 0.30            | 0.04                      | 0.52             | 0.03                      |
| N3   | 0.30            | 0.04                      | 0.52             | 0.03                      |
| N4   | 0.10            | -0.27                     | 0.06             | -0.25                     |
| C1   | -0.15           | 0.11                      | 0.00             | 0.11                      |
| C2   | -0.37           | 0.15                      | -1.30            | 0.11                      |
| C3   | -0.44           | -0.19                     | 0.48             | -0.19                     |
| C4   | -0.06           | -0.17                     | -0.10            | -0.19                     |
| C5   | -0.87           | -0.18                     | -0.44            | -0.18                     |
| C6   | -0.74           | -0.16                     | -0.06            | -0.19                     |
| C7   | 1.69            | -0.05                     | 0.18             | -0.18                     |
| C8   | 1.69            | -0.06                     | 0.18             | -0.18                     |
| C9   | -0.74           | -0.16                     | -0.06            | -0.19                     |
| C10  | -0.87           | -0.18                     | -0.44            | -0.18                     |
| C11  | -0.06           | -0.17                     | -0.10            | -0.19                     |
| C12  | -0.44           | -0.18                     | 0.48             | -0.19                     |
| C13  | -0.37           | 0.14                      | -1.30            | 0.11                      |
| H1   | 0.24            | 0.25                      | 0.20             | 0.23                      |
| H2   | 0.19            | 0.21                      | 0.21             | 0.22                      |
| H3   | 0.18            | 0.21                      | 0.16             | 0.21                      |
| H4   | 0.12            | 0.21                      | 0.21             | 0.22                      |
| H5   | 0.12            | 0.21                      | 0.21             | 0.22                      |
| H6   | 0.18            | 0.21                      | 0.16             | 0.21                      |
| H7   | 0.19            | 0.21                      | 0.21             | 0.22                      |
| H8   | 0.24            | 0.25                      | 0.20             | 0.23                      |
| H9   | -               | -                         | 0.21             | 0.24                      |
| H10  | -               | -                         | 0.21             | 0.24                      |

◆ Experiments of deprotonation and protonation of BTC amine salts  $5\cdot\text{H}^+$  (Procedure A) and  $6\cdot\text{H}^+$  (Procedure B).

A mixture of BTC amine salts (A: 3.5 mg [0.011 mmol], B: 4.2 [0.011 mmol]), NaOH (A: 0.97 g [24 mmol], B: 0.57 g [14 mmol]),  $\text{CH}_2\text{Cl}_2$  (10 mL), and  $\text{H}_2\text{O}$  (10 mL) was shaken vigorously in the flask. The organic layer was extracted with 1.0 mL and diluted to 10 mL with acetonitrile. The UV-Vis spectra of the acetonitrile solutions were measured on 3 mL in a  $1.0 \times 1.0$  cm crystal cell at 20 °C. Aq.  $\text{HBF}_4$  (42%, 10  $\mu\text{L}$ , 0.066 mmol) was then added to the sample cell, and the measurements were repeated. The concentrations of BTC amine species were calculated from a calibration curve of BTC amine salts in acetonitrile (Figure S14, S15).

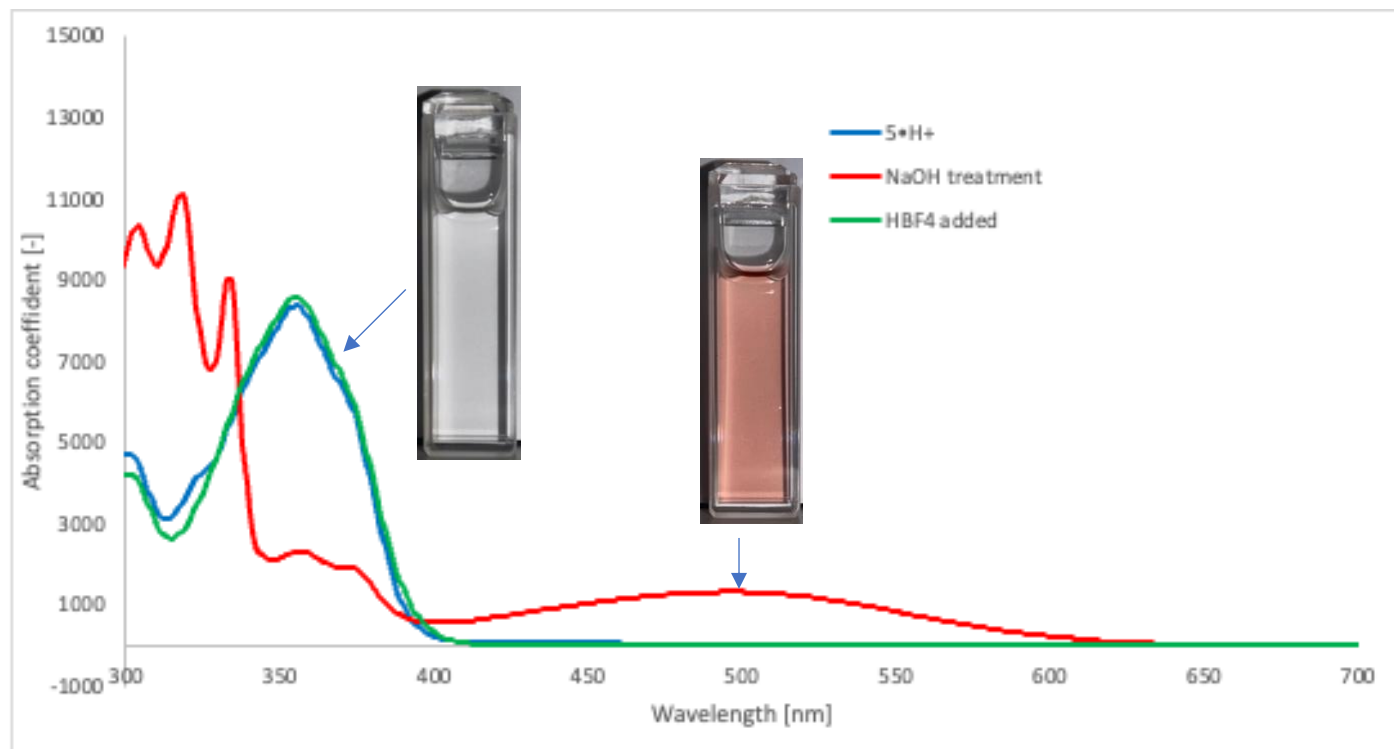

**Figure S7.**  $5\cdot\text{H}^+$ /acetonitrile solution (blue,  $[5/5\cdot\text{H}^+] = 0.10$  mM), NaOH treatment (red,  $[5/5\cdot\text{H}^+] = 0.15$  mM), following added aq.  $\text{HBF}_4$  (green,  $[5/5\cdot\text{H}^+] = 0.15$  mM)

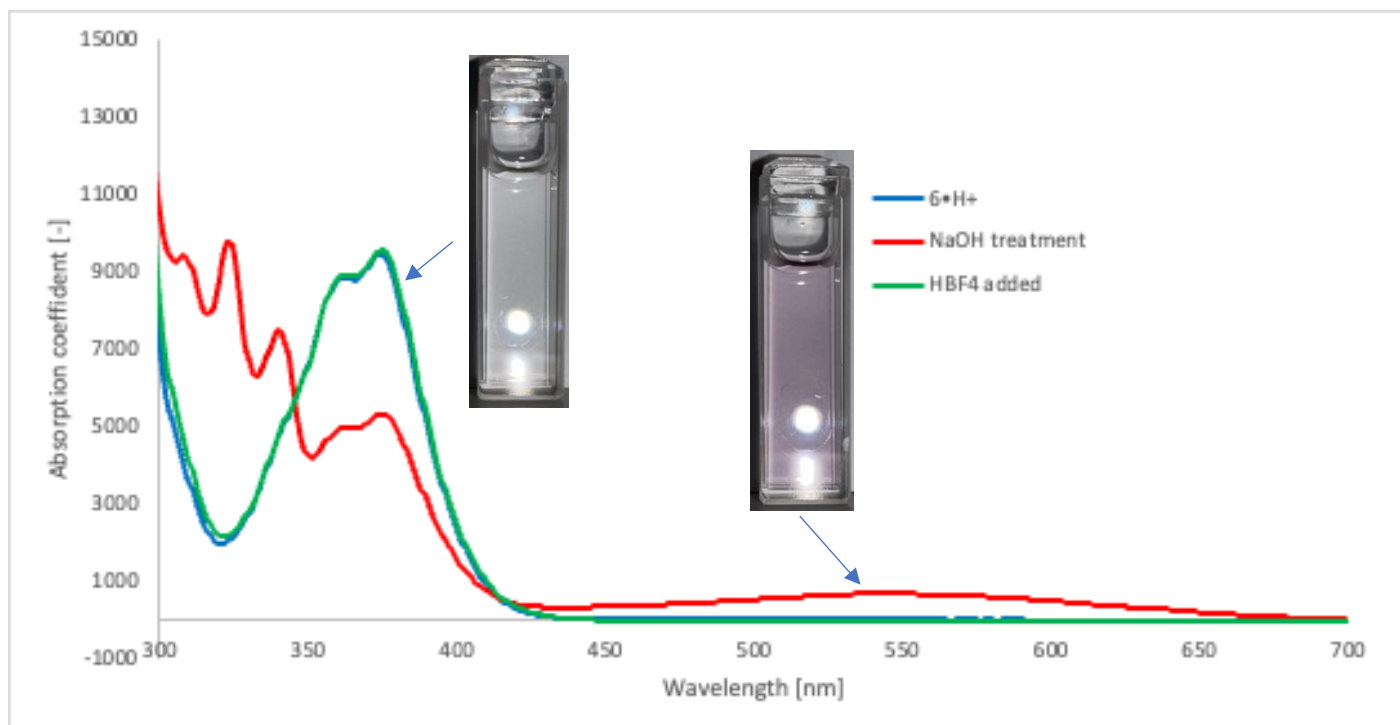

**Figure S8.**  $6\bullet\text{H}^+$ /acetonitrile solution (blue,  $[6/6\bullet\text{H}^+] = 0.14 \text{ mM}$ ), NaOH treatment (red,  $[6/6\bullet\text{H}^+] = 0.10 \text{ mM}$ ), following added aq.  $\text{HBF}_4$  (green,  $[6/6\bullet\text{H}^+] = 0.10 \text{ mM}$ )

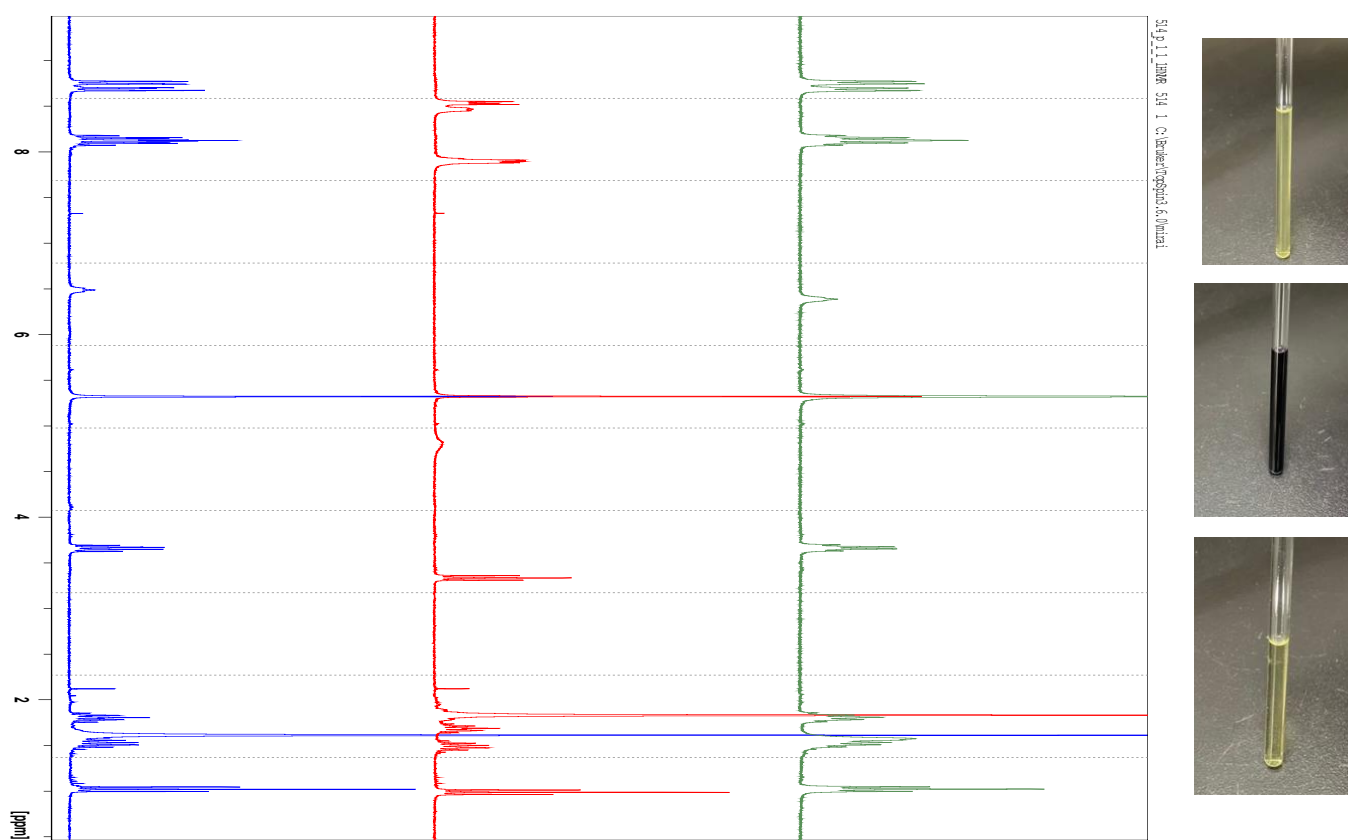

**Figure S9.**  $^1\text{H}$  NMR (left) and the color of samples (right) for tracking of BTC- $\text{NH}^n\text{Bu}$  **6** with acid and base in  $\text{CD}_2\text{Cl}_2$ . Initial (top), after NaOH aq. separating (middle), after  $\text{HBF}_4$  aq. separating (bottom).

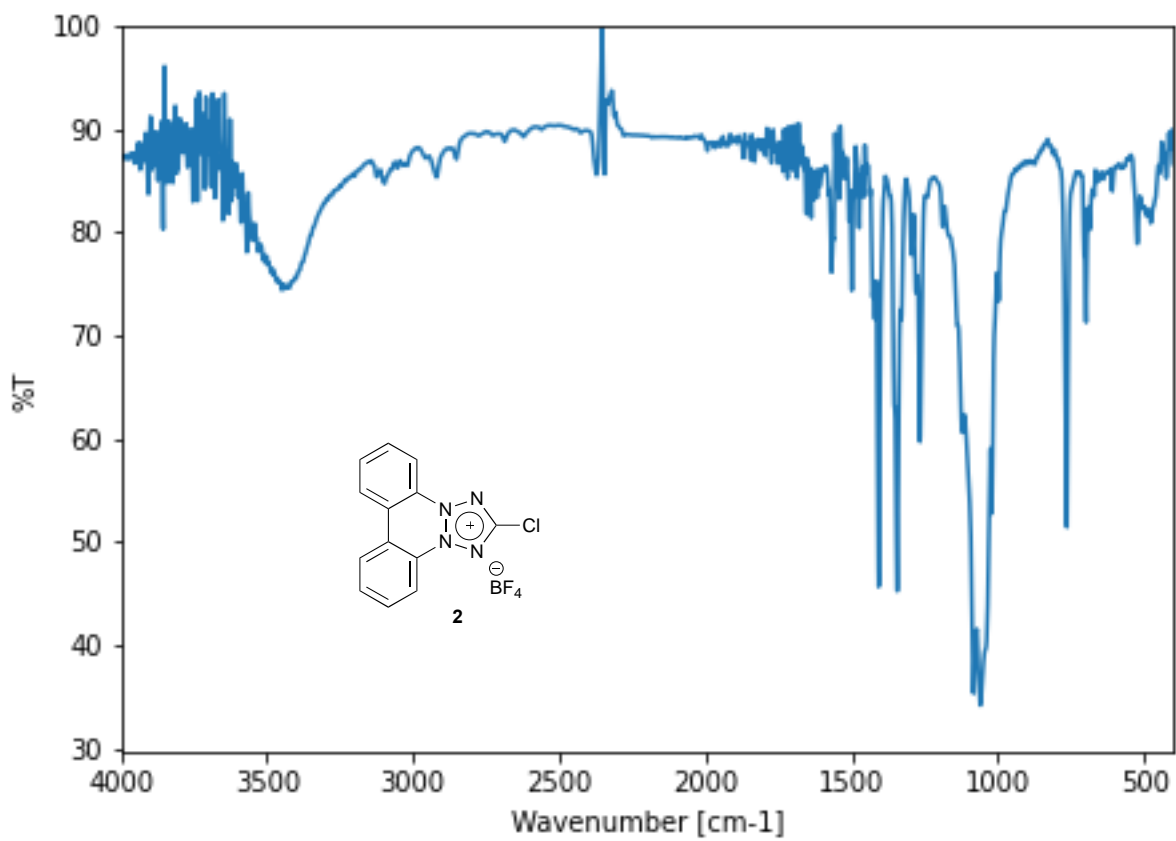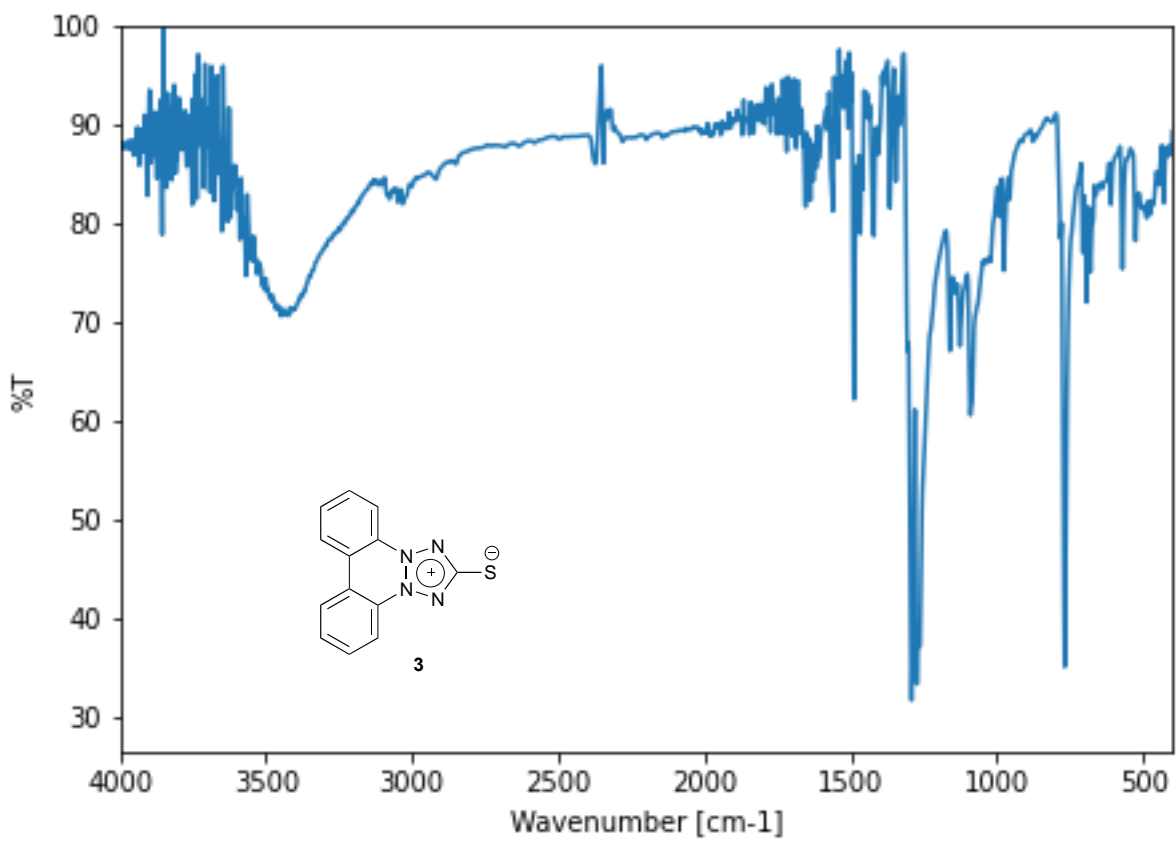



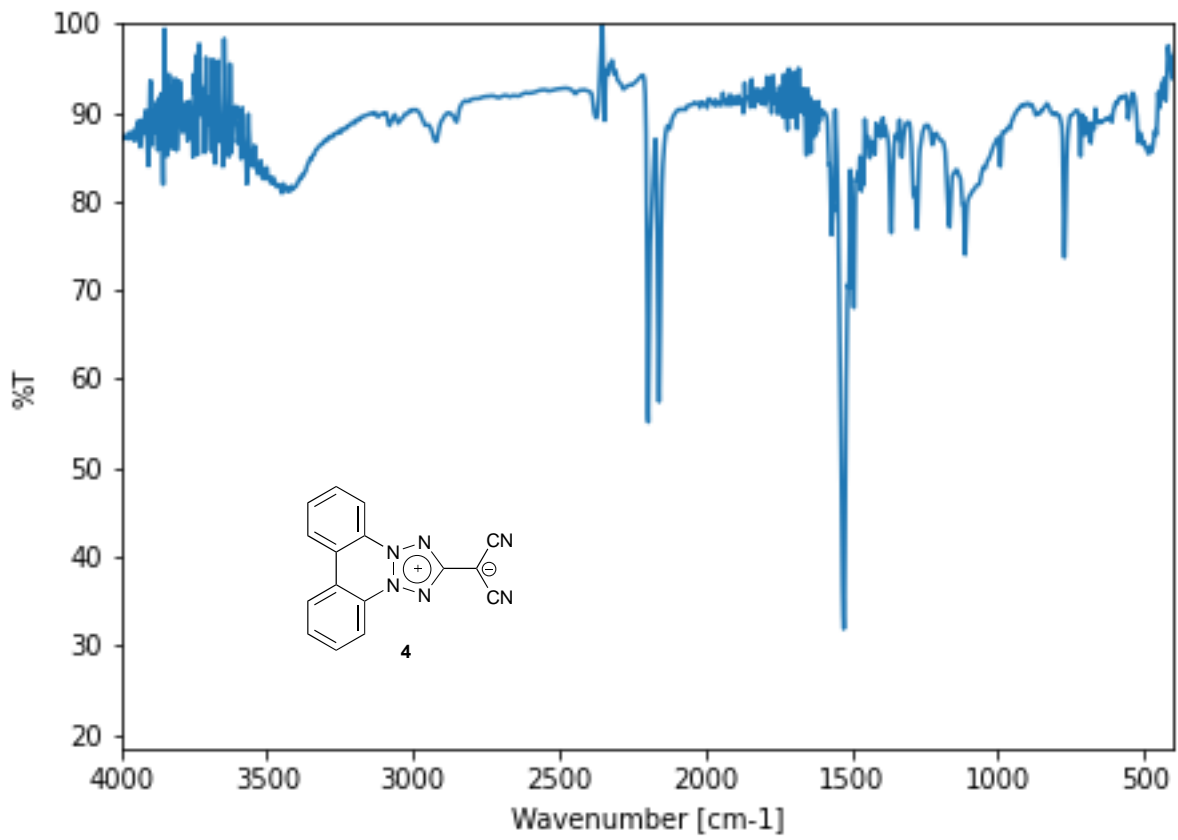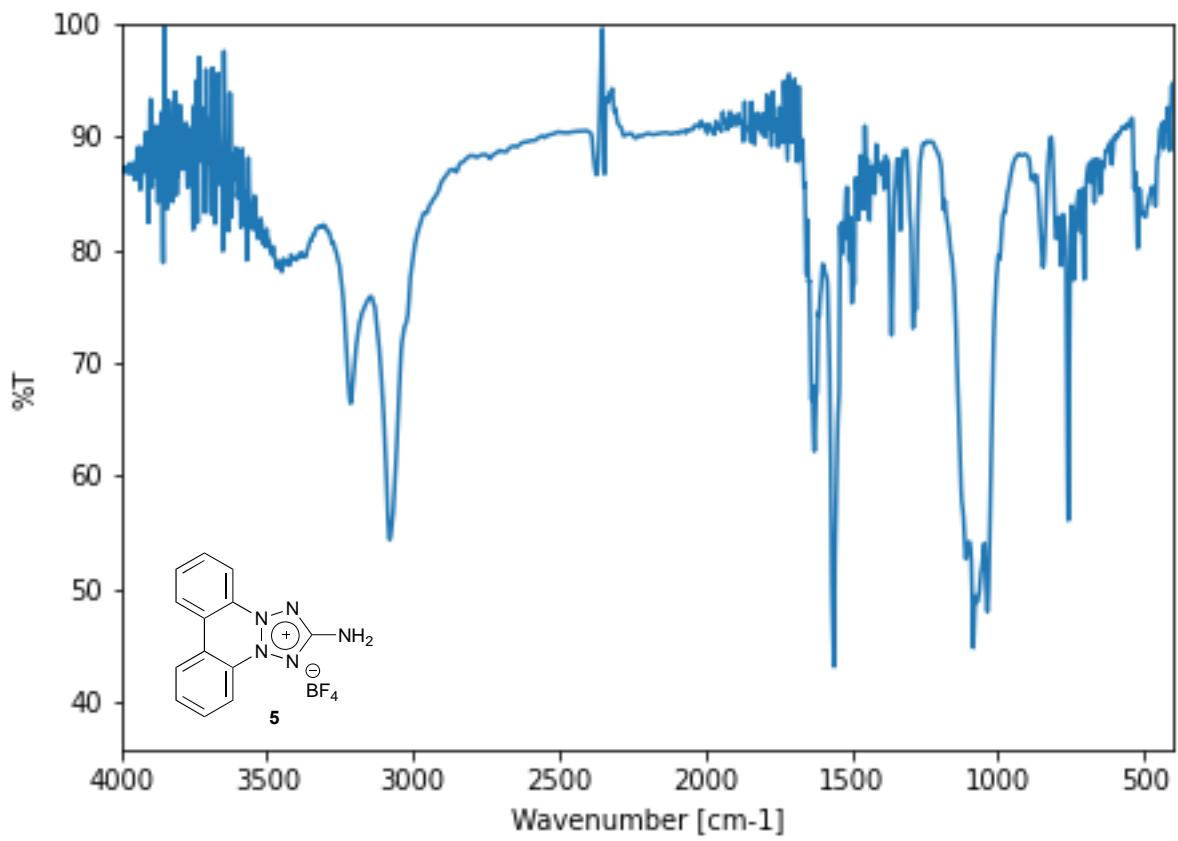

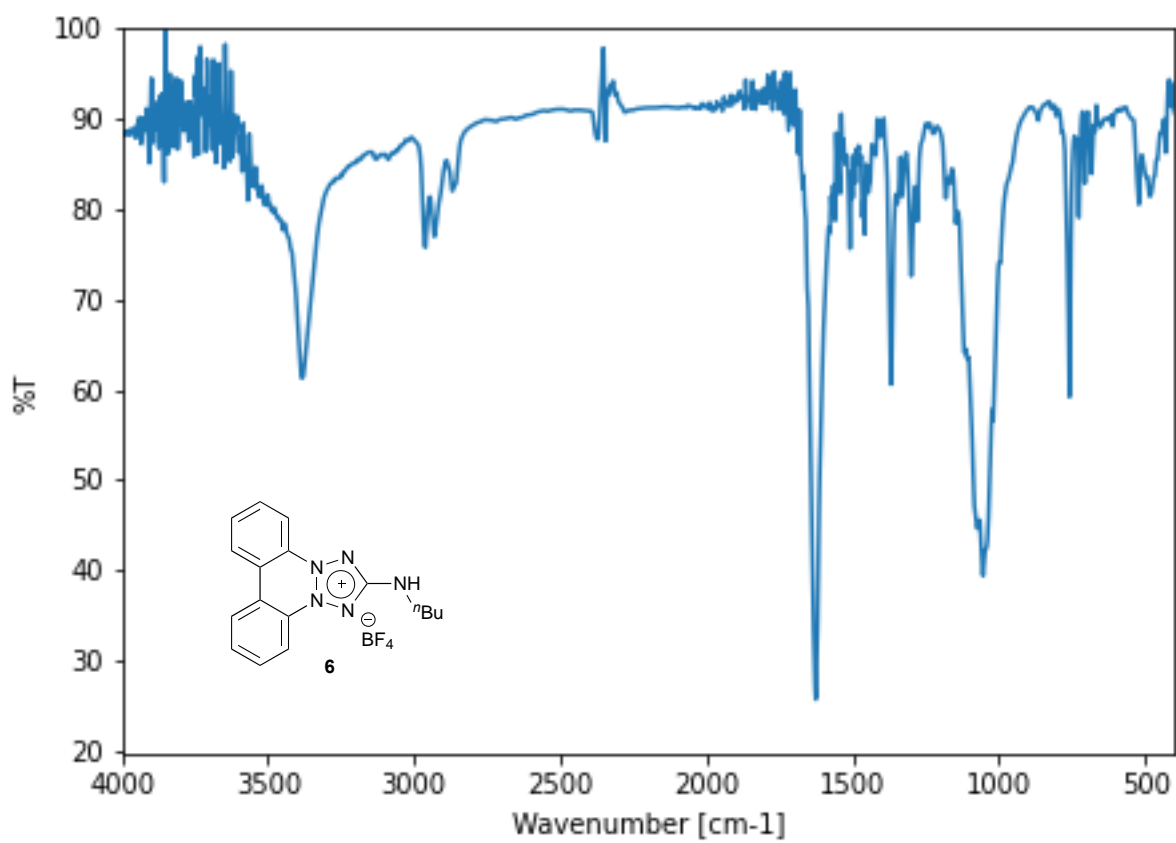

Figure S10. IR spectra of BTC 2-6 using KBr.

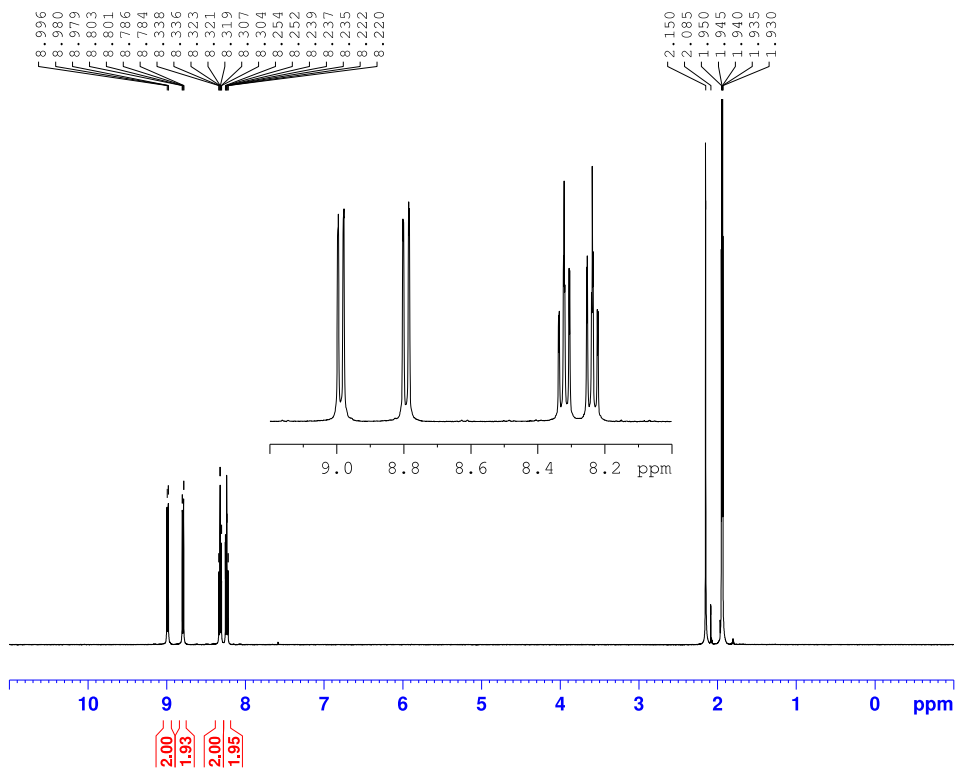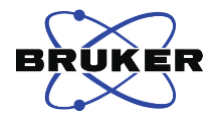

Current Data Parameters  
 NAME NMexp.164-1-H-500-CD3CN  
 EXPNO 10  
 PROCNO 1

F2 - Acquisition Parameters  
 Date\_ 20181026  
 Time 12.39 h  
 INSTRUM spect  
 PROBHD z107909\_0012 ( )  
 PULPROG zg30  
 TD 65536  
 SOLVENT CD3CN  
 NS 8  
 DS 2  
 SWH 10000.000 Hz  
 FIDRES 0.305176 Hz  
 AQ 3.2767399 sec  
 RG 18  
 DW 50.000 usec  
 DE 10.00 usec  
 TE 297.0 K  
 DL 5.00000000 sec  
 TD0 1  
 SFO1 500.0330002 MHz  
 NUC1 1H  
 P1 15.00 usec  
 PLW1 6.21000004 W

F2 - Processing parameters  
 SI 32768  
 SF 500.0300141 MHz  
 WDW EM  
 SSB 0  
 LB 0.30 Hz  
 GB 0  
 PC 1.00

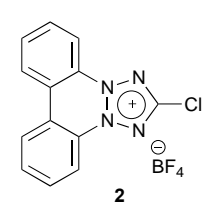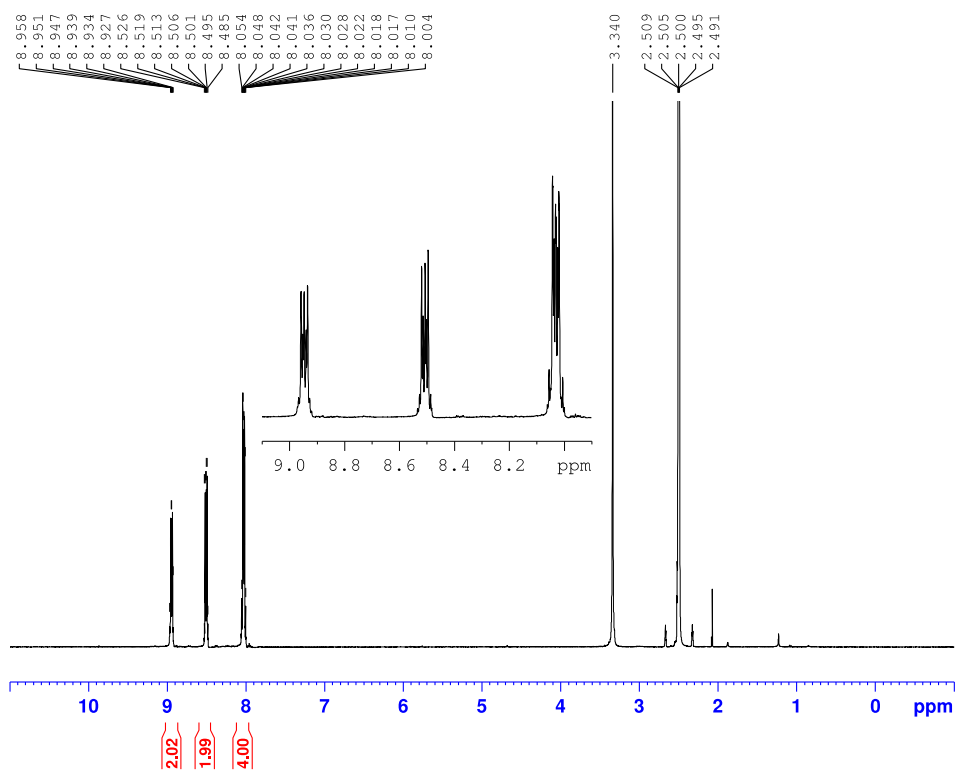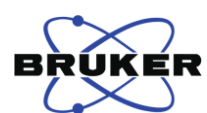

Current Data Parameters  
 NAME 531\_p\_1\_NMR  
 EXPNO 10  
 PROCNO 1

F2 - Acquisition Parameters  
 Date\_ 20211201  
 Time 2.56 h  
 INSTRUM spect  
 PROBHD z108618\_0210 ( )  
 PULPROG zg30  
 TD 65536  
 SOLVENT DMSO  
 NS 64  
 DS 1  
 SWH 8012.820 Hz  
 FIDRES 0.244532 Hz  
 AQ 4.0894465 sec  
 RG 203  
 DW 62.400 usec  
 DE 6.50 usec  
 TE 298.0 K  
 DL 2.00000000 sec  
 TD0 1  
 SFO1 400.1324710 MHz  
 NUC1 1H  
 P1 16.00 usec  
 PLW1 13.73499966 W

F2 - Processing parameters  
 SI 65536  
 SF 400.1300033 MHz  
 WDW EM  
 SSB 0  
 LB 0.30 Hz  
 GB 0  
 PC 1.00

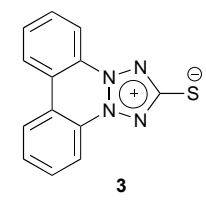

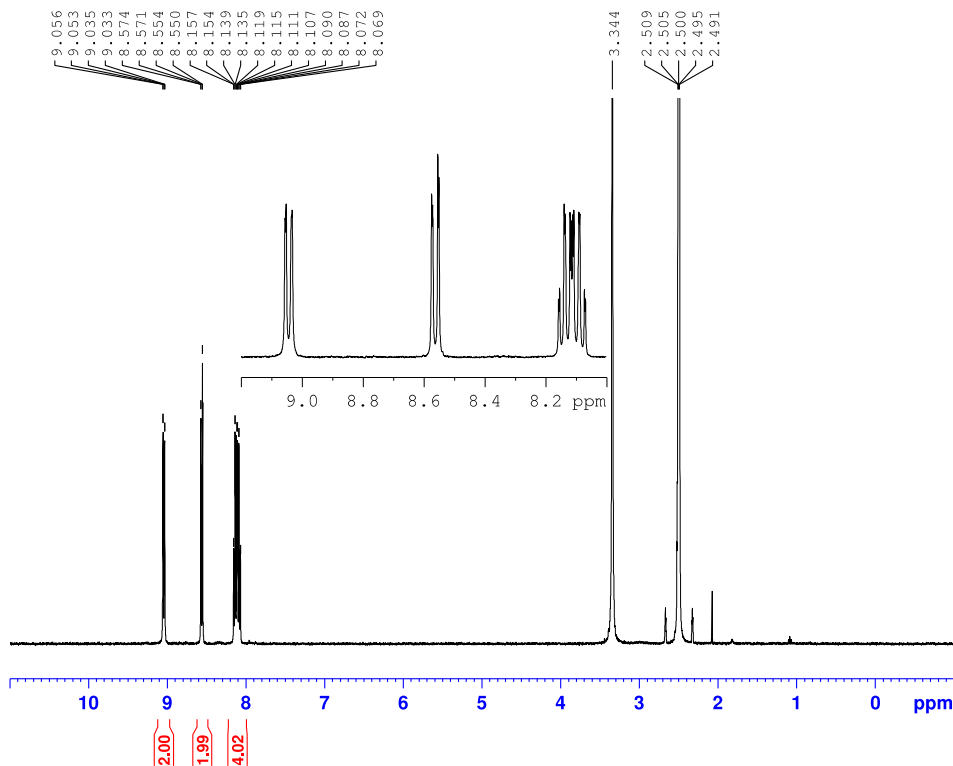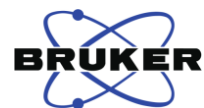

Current Data Parameters  
 NAME 478\_p\_1\_1\_NMR  
 EXPNO 10  
 PROCNO 1

F2 - Acquisition Parameters  
 Date\_ 20210615  
 Time 19.06 h  
 INSTRUM spect  
 PROBHD Z108618\_0210 ( )  
 PULPROG zg30  
 TD 65536  
 SOLVENT DMSO  
 NS 16  
 DS 2  
 SWH 8012.820 Hz  
 FIDRES 0.244532 Hz  
 AQ 4.0894465 sec  
 RG 203  
 DW 62.400 usec  
 DE 6.50 usec  
 TE 298.0 K  
 D1 2.0000000 sec  
 TD0 1  
 SF01 400.1324710 MHz  
 NUC1 1H  
 P1 16.00 usec  
 PLW1 13.73499966 W

F2 - Processing parameters  
 SI 65536  
 SF 400.1300034 MHz  
 WDN EM  
 SSB 0  
 LB 0.30 Hz  
 GB 0  
 PC 1.00

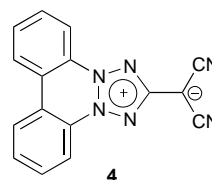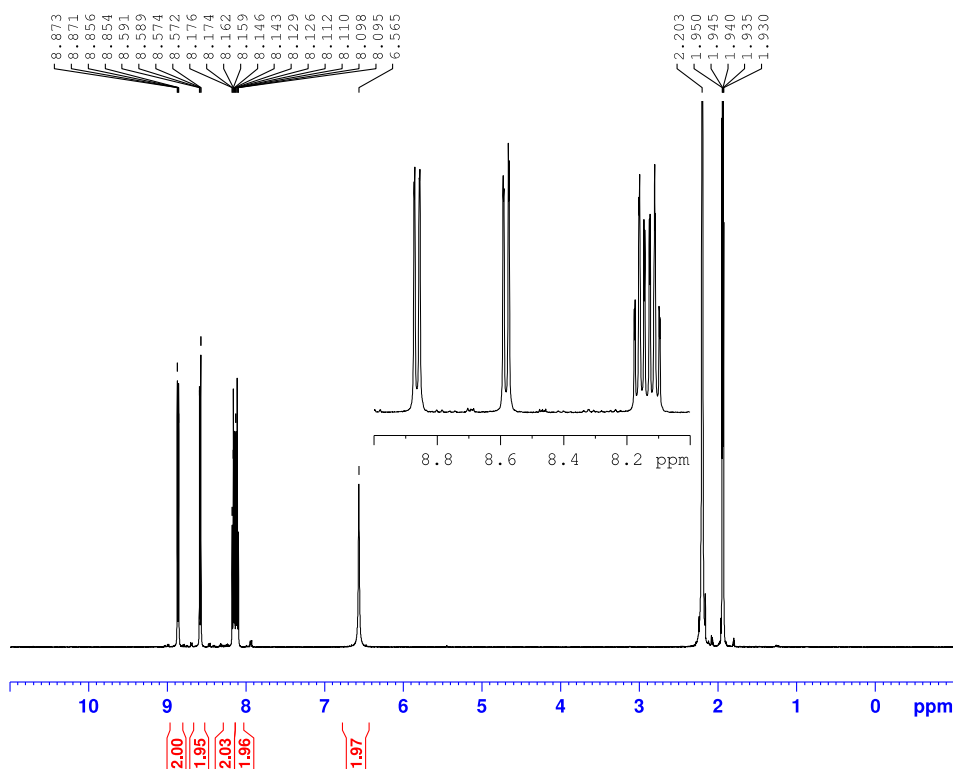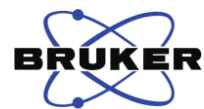

Current Data Parameters  
 NAME NMaxp.146-Crude-2-H-500  
 EXPNO 10  
 PROCNO 1

F2 - Acquisition Parameters  
 Date\_ 20180918  
 Time 19.57 h  
 INSTRUM spect  
 PROBHD Z107909\_0012 ( )  
 PULPROG zg30  
 TD 65536  
 SOLVENT CD3CN  
 NS 8  
 DS 2  
 SWH 10000.000 Hz  
 FIDRES 0.305176 Hz  
 AQ 3.2767999 sec  
 RG 18  
 DW 50.000 usec  
 DE 10.00 usec  
 TE 297.0 K  
 D1 5.0000000 sec  
 TD0 1  
 SF01 500.0330002 MHz  
 NUC1 1H  
 P1 15.00 usec  
 PLW1 6.21000004 W

F2 - Processing parameters  
 SI 32768  
 SF 500.0300142 MHz  
 WDN EM  
 SSB 0  
 LB 0.30 Hz  
 GB 0  
 PC 1.00

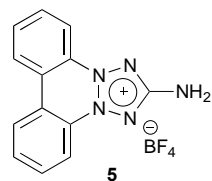

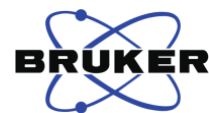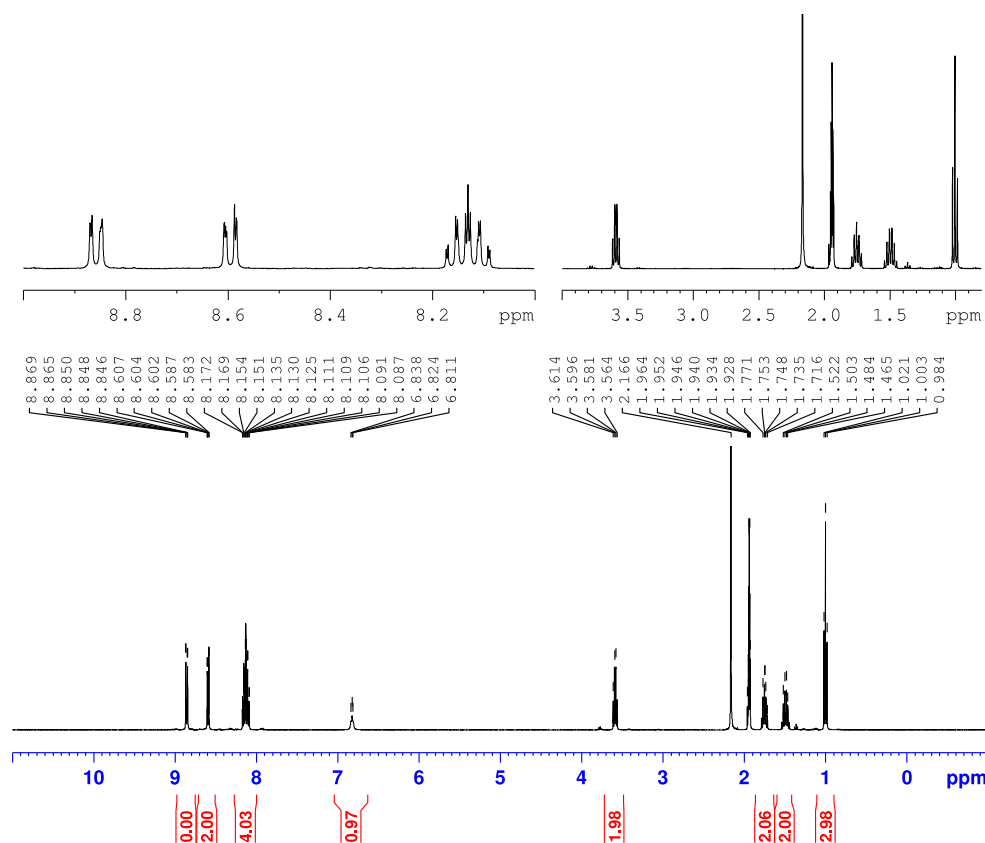

Figure S11. <sup>1</sup>H NMR spectra of BTC 2-6.

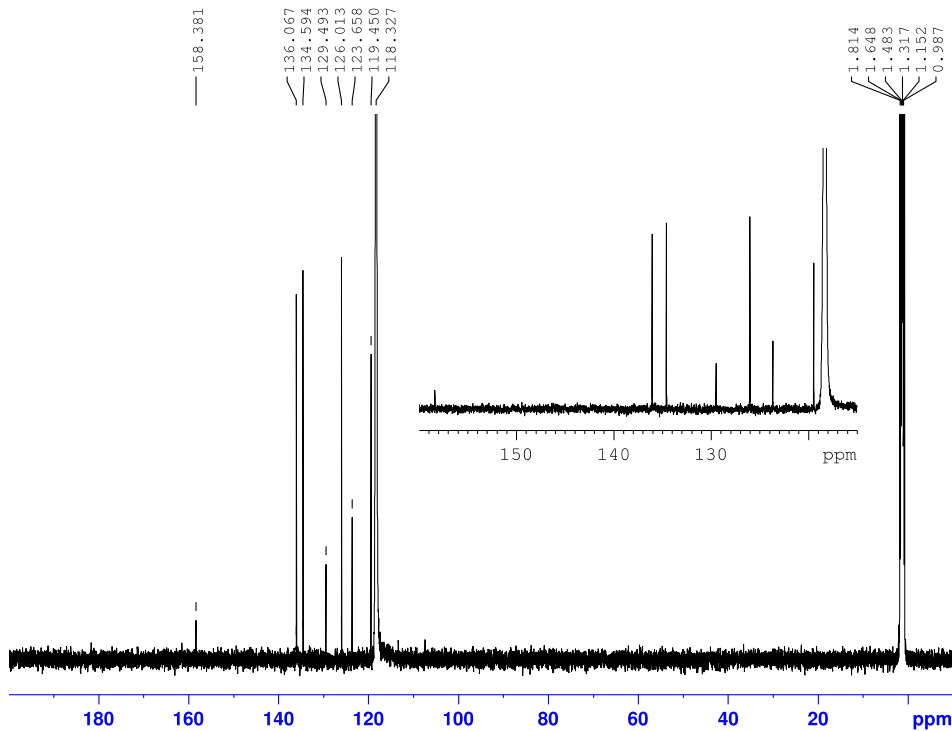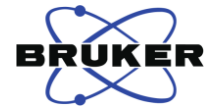

Current Data Parameters  
 NAME NMexp.164-1-c-500-CD3CN  
 EXPNO 10  
 PROCNO 1  
 F2 - Acquisition Parameters  
 Date\_ 20181026  
 Time 12.59 h  
 INSTRUM spect  
 PROBHD Z107905\_0012 ( )  
 PULPROG zgpg30  
 TD 65356  
 SOLVENT CD3CN  
 NS 256  
 DS 4  
 SWH 29761.904 Hz  
 FIDRES 0.910763 Hz  
 AQ 1.097809 sec  
 RG 45.2  
 DW 16.800 usec  
 DE 18.00 usec  
 TE 297.0 K  
 D1 2.0000000 sec  
 D11 0.0300000 sec  
 TD0 1  
 SF01 125.7452168 MHz  
 NUC1 13C  
 P1 10.00 usec  
 PLW1 25.4519966 W  
 SF02 500.0320001 MHz  
 NUC2 1H  
 CDPDRG(2) waltz16  
 PCPD2 80.00 usec  
 PLW2 6.2100004 W  
 PLW12 0.21832000 W  
 PLW13 0.10981000 W  
 F2 - Processing parameters  
 SI 32768  
 SF 125.7325241 MHz  
 WDW EM  
 SSB 0  
 LB 1.00 Hz  
 GB 0  
 PC 1.40

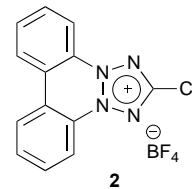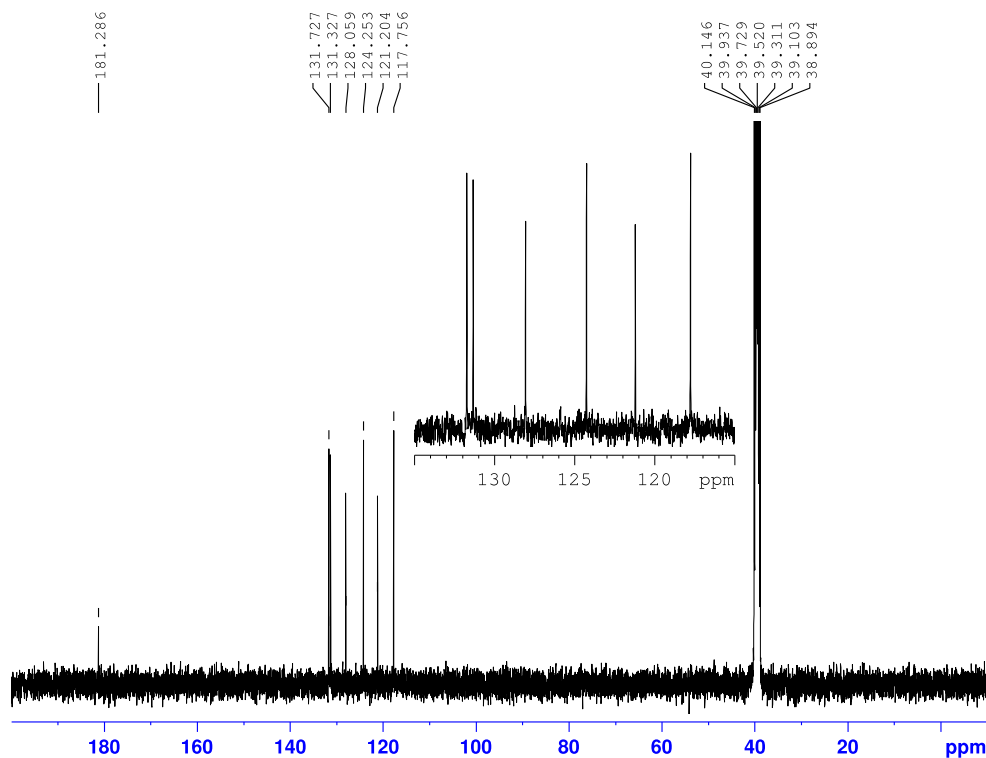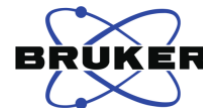

Current Data Parameters  
 NAME 531\_p\_1\_13CNMR  
 EXPNO 11  
 PROCNO 1  
 F2 - Acquisition Parameters  
 Date\_ 20211201  
 Time 4.55 h  
 INSTRUM spect  
 PROBHD Z108618\_0210 ( )  
 PULPROG zgpg30  
 TD 65536  
 SOLVENT DMSO  
 NS 2048  
 DS 4  
 SWH 24038.461 Hz  
 FIDRES 0.733596 Hz  
 AQ 1.3631488 sec  
 RG 203  
 DW 20.800 usec  
 DE 6.50 usec  
 TE 300.0 K  
 D1 2.0000000 sec  
 D11 0.0300000 sec  
 TD0 1  
 SF01 100.6228298 MHz  
 NUC1 13C  
 P1 9.50 usec  
 PLW1 59.31800079 W  
 SF02 400.1316005 MHz  
 NUC2 1H  
 CDPDRG(2) waltz16  
 PCPD2 90.00 usec  
 PLW2 13.73499966 W  
 PLW12 0.43408999 W  
 PLW13 0.21834999 W  
 F2 - Processing parameters  
 SI 32768  
 SF 100.6128172 MHz  
 WDW EM  
 SSB 0  
 LB 1.00 Hz  
 GB 0  
 PC 1.40

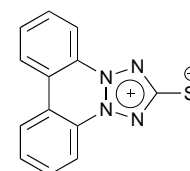

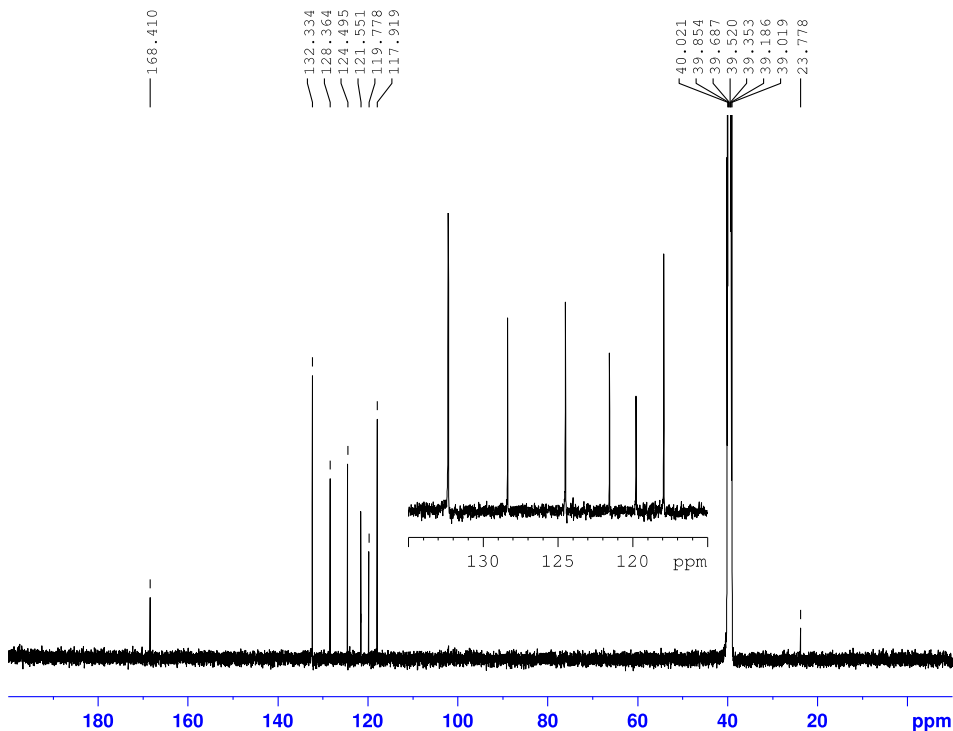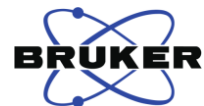

```

Current Data Parameters
NAME      478_p_1_13CNMR
EXPNO    10
PROCNO   1

F2 - Acquisition Parameters
Date_    20210616
Time     17.22 h
INSTRUM spect
PROBHD   Z107909_0012 (
PULPROG zgpg30
TD       65356
SOLVENT  DMSO
NS       512
DS       4
SWH      29761.904 Hz
FIDRES   0.910763 Hz
AQ       1.0979809 sec
RG       10
DW       16.800 usec
DE       18.00 usec
TE       300.0 K
D1       4.0000000 sec
D11      0.0300000 sec
TD0      1
SF01     125.7452168 MHz
NUC1     13C
F1       10.00 usec
PLW1     27.0000000 W
SF02     500.0320001 MHz
NUC2     1H
CPDPRG2 waltz16
PCPD2    80.00 usec
PLW2     15.0000000 W
PLW12    0.23438001 W
PLW13    0.11789000 W

F2 - Processing parameters
SI       32768
SF       125.7327016 MHz
WDW      EM
SSB      0
LB       1.00 Hz
GB       0
PC       1.40
  
```

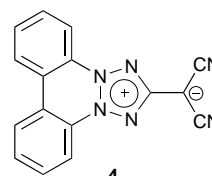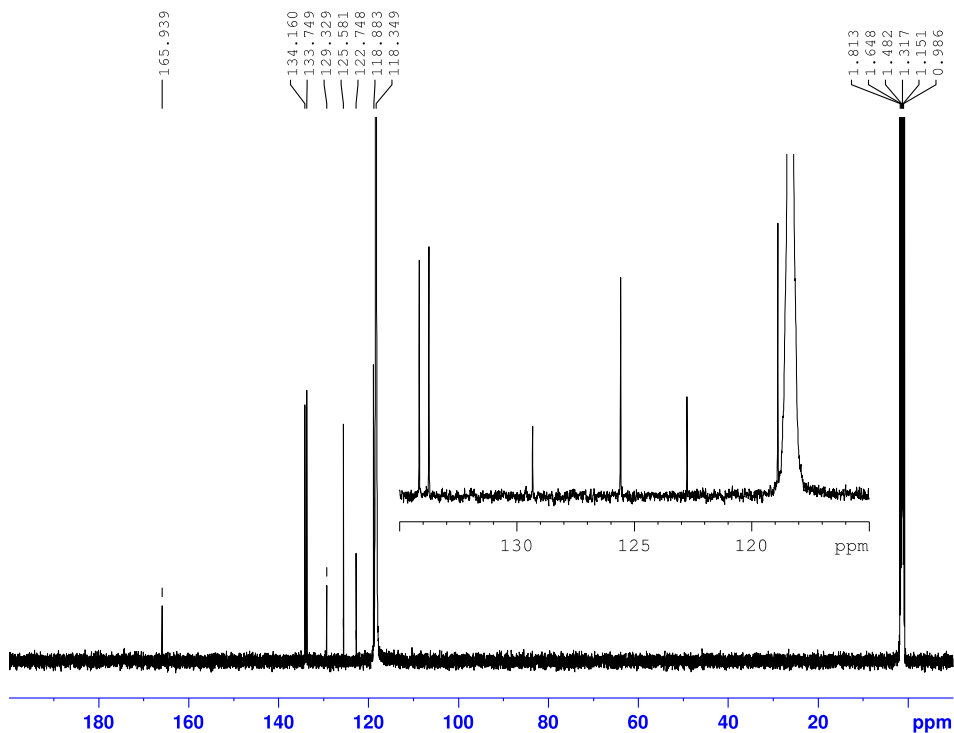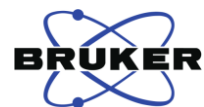

```

Current Data Parameters
NAME      NMaxp.146-Crude-2-C-500
EXPNO    10
PROCNO   1

F2 - Acquisition Parameters
Date_    20180918
Time     19.08 h
INSTRUM spect
PROBHD   Z107909_0012 (
PULPROG zgpg30
TD       65356
SOLVENT  CD3CN
NS       128
DS       4
SWH      29761.904 Hz
FIDRES   0.910763 Hz
AQ       1.0979809 sec
RG       50.8
DW       16.800 usec
DE       18.00 usec
TE       297.0 K
D1       2.0000000 sec
D11      0.0300000 sec
TD0      1
SF01     125.7452168 MHz
NUC1     13C
F1       10.00 usec
PLW1     25.4519996 W
SF02     500.0320001 MHz
NUC2     1H
CPDPRG2 waltz16
PCPD2    80.00 usec
PLW2     6.21000004 W
PLW12    0.21832000 W
PLW13    0.10981000 W

F2 - Processing parameters
SI       32768
SF       125.7325241 MHz
WDW      EM
SSB      0
LB       1.00 Hz
GB       0
PC       1.40
  
```

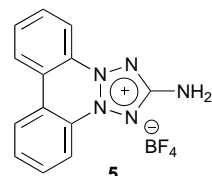

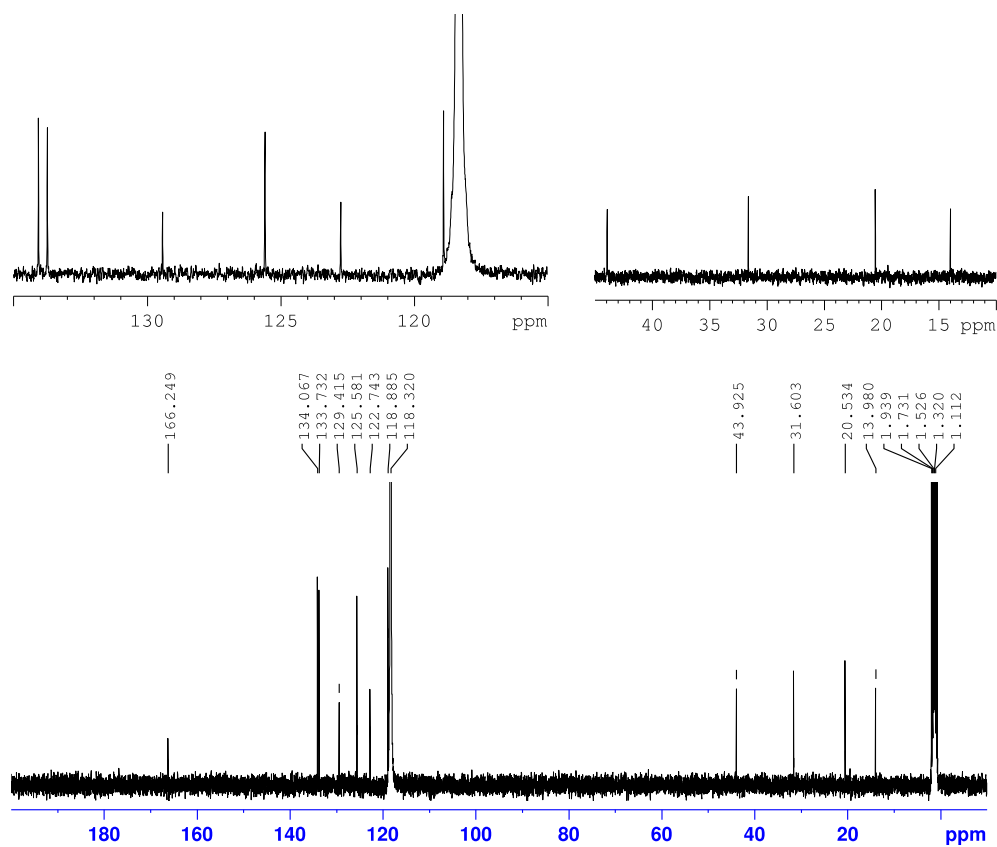

Current Data Parameters  
NAME 479\_p\_1\_NMR  
EXPNO 12  
PROCNO 1

F2 - Acquisition Parameters  
Date\_ 20210616  
Time 0.06 h  
INSTRUM spect  
PROBHD 2108618\_0210 (  
PULPROG zgpg30  
TD 65536  
SOLVENT CD3CN  
NS 1024  
DS 2  
SWH 24038.461 Hz  
FIDRES 0.733596 Hz  
AQ 1.3631488 sec  
RG 203  
DW 20.800 usec  
DE 6.50 usec  
TE 300.0 K  
D1 3.00000000 sec  
D11 0.03000000 sec  
TDO 1  
SFO1 100.6228293 MHz  
NUC1 13C  
P1 9.50 usec  
PLW1 59.31800079 W  
SFO2 400.1316005 MHz  
NUC2 1H  
CPDPRG[2] waltz16  
PCPD2 90.00 usec  
PLW2 13.73499966 W  
PLW12 0.43408999 W  
PLW13 0.21834999 W

F2 - Processing parameters  
SI 32768  
SF 100.6126685 MHz  
WDW EM  
SSB 0  
LB 1.00 Hz  
GB 0  
PC 1.40

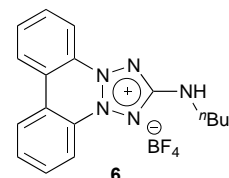

Figure S12. <sup>13</sup>C NMR spectra of BTC 2-6.



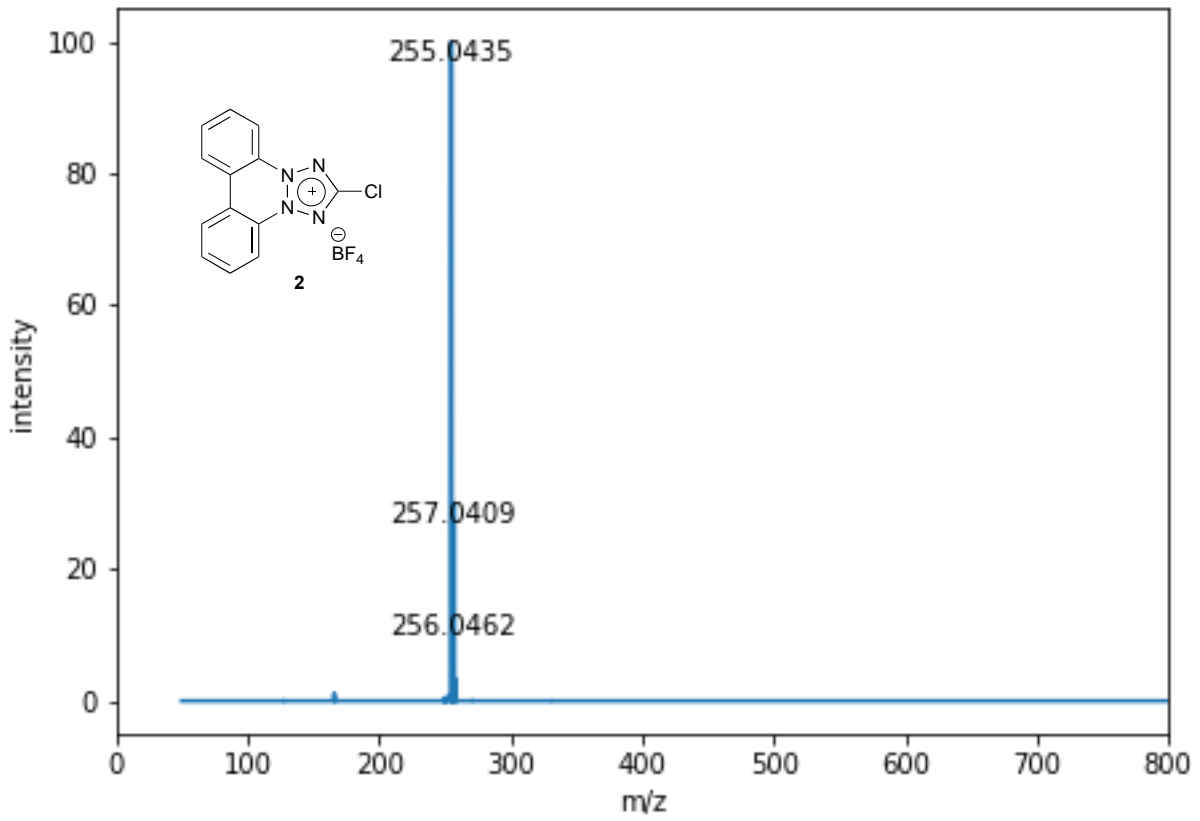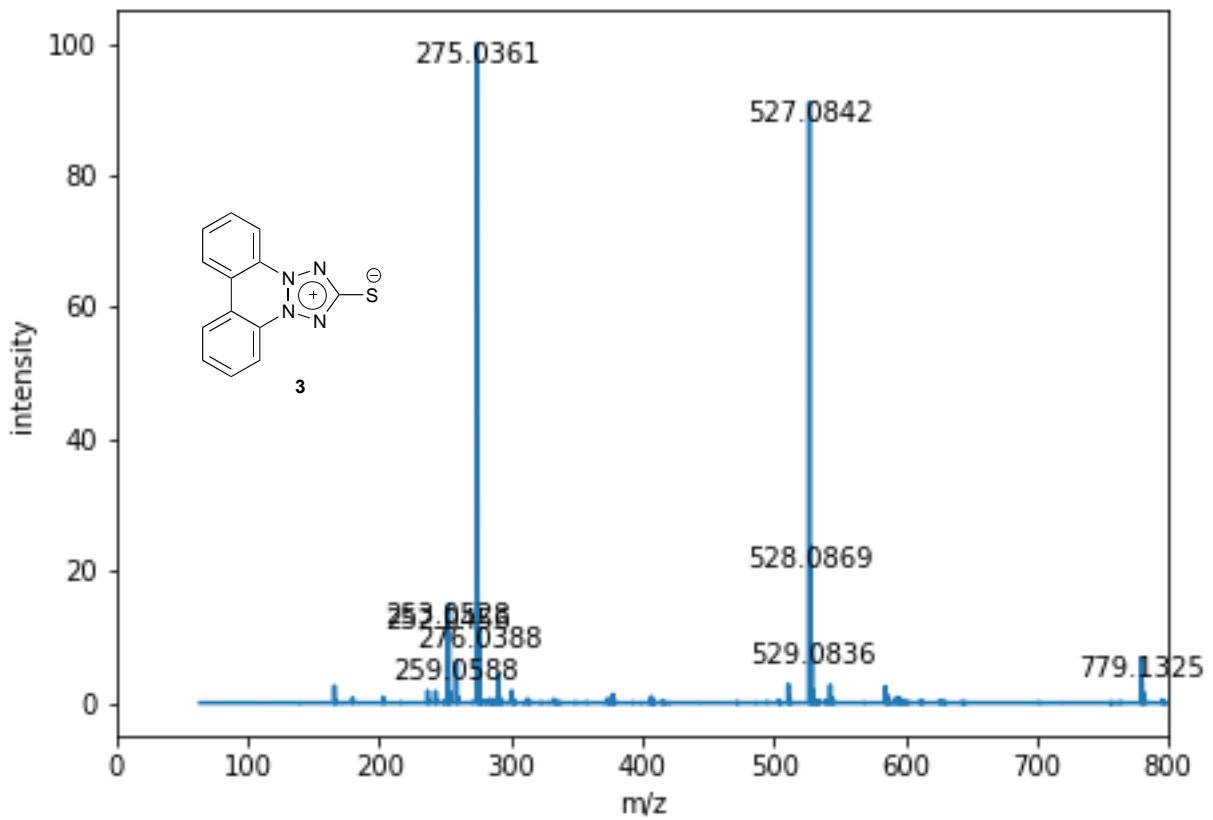

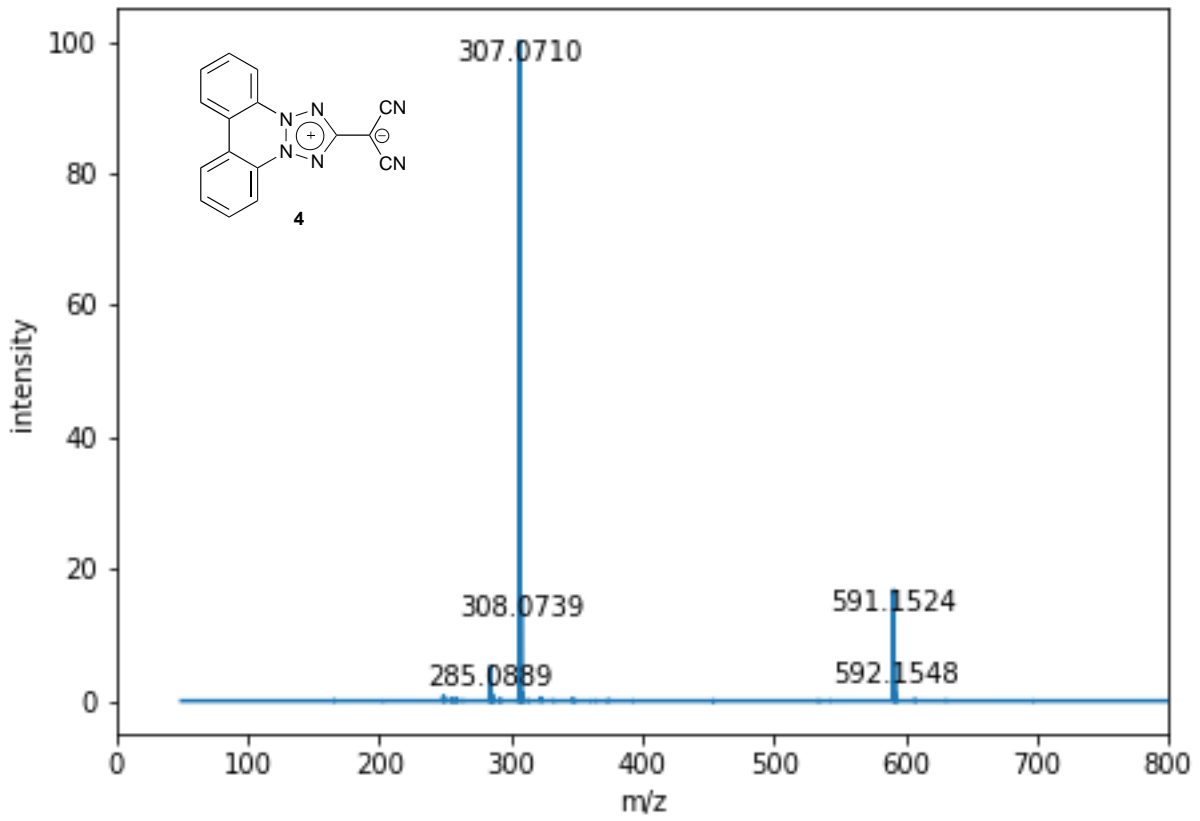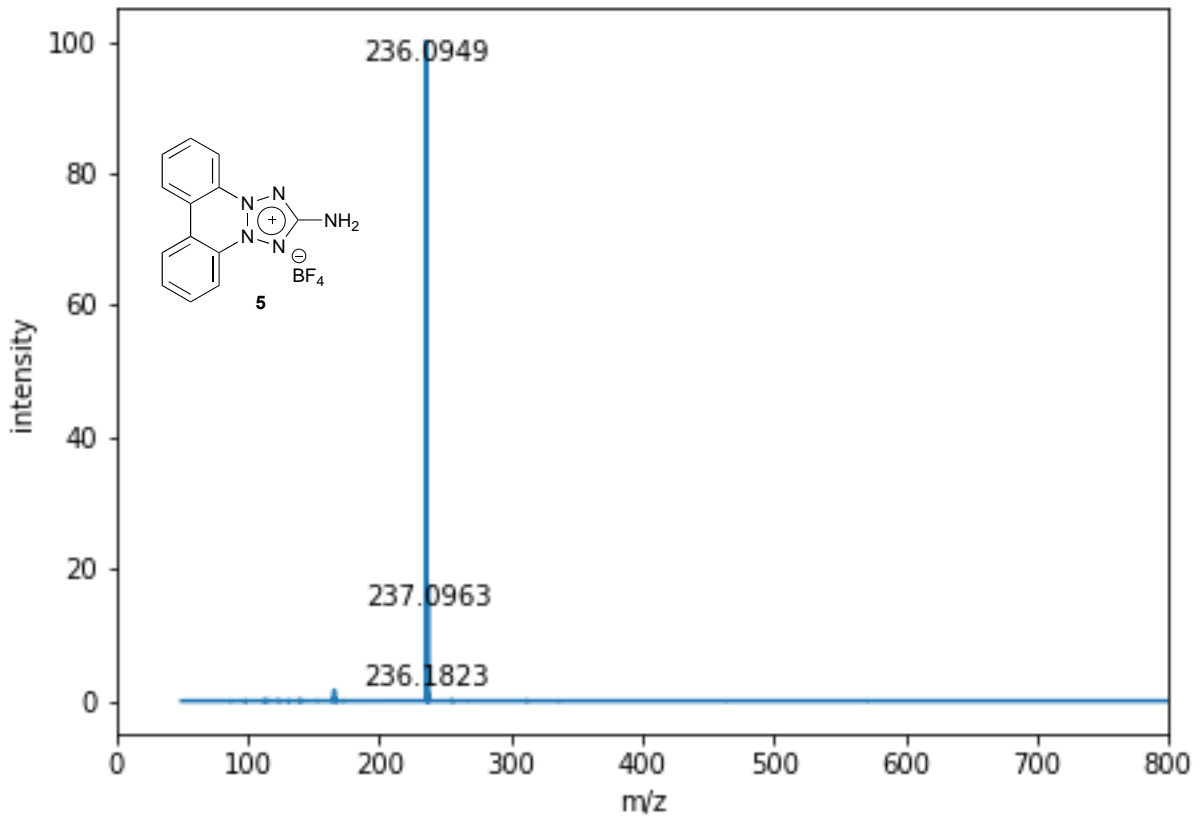

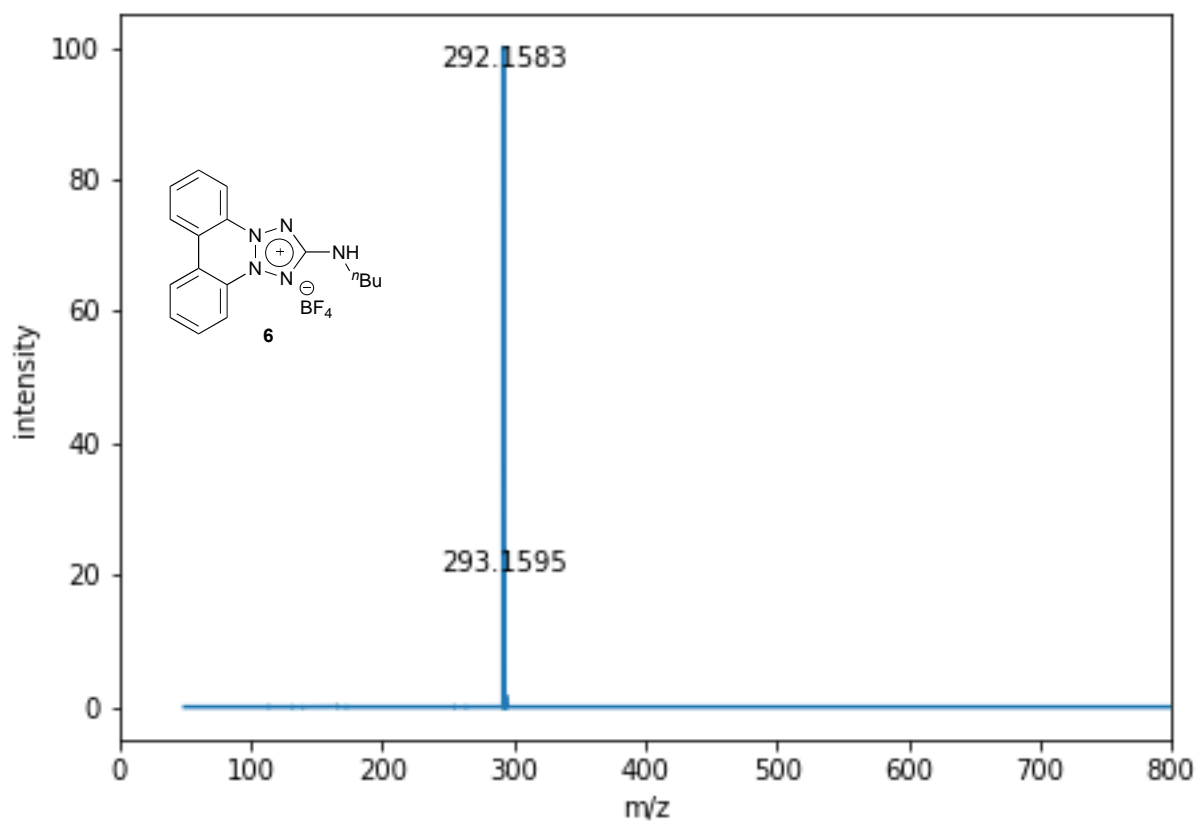

**Figure S13.** MS of BTC 2-6 using ESI-TOF positive mode.

**Table S8.** The calculation of optimized geometry of BTC-S **3** in gas phase.

| Center<br>number | Atomic<br>symbol | Coordinates (Angstroms) |           |           |
|------------------|------------------|-------------------------|-----------|-----------|
|                  |                  | X                       | Y         | Z         |
| 1                | S                | -4.499500               | 0.000156  | 0.000237  |
| 2                | N                | -2.017441               | -1.130903 | 0.000099  |
| 3                | N                | -0.790915               | -0.676221 | 0.000045  |
| 4                | N                | -0.790800               | 0.676350  | -0.000540 |
| 5                | N                | -2.017359               | 1.131113  | -0.000491 |
| 6                | C                | -2.831630               | 0.000192  | -0.000066 |
| 7                | C                | 0.395096                | -1.423056 | 0.000018  |
| 8                | C                | 0.311637                | -2.819962 | 0.000133  |
| 9                | C                | 1.483600                | -3.552810 | 0.000096  |
| 10               | C                | 2.724231                | -2.898365 | -0.000072 |
| 11               | C                | 2.790382                | -1.516220 | -0.000154 |
| 12               | C                | 1.623046                | -0.729534 | -0.000052 |
| 13               | C                | 1.623147                | 0.729388  | -0.000057 |
| 14               | C                | 2.790575                | 1.515918  | 0.000214  |
| 15               | C                | 2.724627                | 2.898079  | 0.000295  |
| 16               | C                | 1.484066                | 3.552666  | 0.000159  |
| 17               | C                | 0.312012                | 2.819974  | -0.000094 |
| 18               | C                | 0.395268                | 1.423051  | -0.000165 |
| 19               | H                | -0.663030               | -3.288590 | 0.000252  |
| 20               | H                | 1.438732                | -4.635018 | 0.000173  |
| 21               | H                | 3.639713                | -3.477691 | -0.000151 |
| 22               | H                | 3.759396                | -1.035334 | -0.000301 |
| 23               | H                | 3.759533                | 1.034905  | 0.000353  |
| 24               | H                | 3.640182                | 3.477279  | 0.000519  |
| 25               | H                | 1.439321                | 4.634888  | 0.000233  |
| 26               | H                | -0.662581               | 3.288749  | -0.000197 |

Calculated at the B3LYP/6-311++G(d,p) level. HF = -1117.5189847, Number of imaginary frequencies = 0

| Center<br>number | Atomic<br>symbol | Coordinates (Angstroms) |           |           |
|------------------|------------------|-------------------------|-----------|-----------|
|                  |                  | X                       | Y         | Z         |
| 1                | S                | 0.000000                | 0.000000  | -4.499448 |
| 2                | N                | 0.000000                | -1.131013 | -2.017337 |
| 3                | N                | 0.000000                | -0.676164 | -0.790767 |
| 4                | N                | 0.000000                | 0.676164  | -0.790767 |
| 5                | N                | 0.000000                | 1.131013  | -2.017337 |
| 6                | C                | 0.000000                | 0.000000  | -2.831577 |
| 7                | C                | 0.000000                | -1.423088 | 0.395267  |

|    |   |          |           |           |
|----|---|----------|-----------|-----------|
| 8  | C | 0.000000 | -2.819928 | 0.311733  |
| 9  | C | 0.000000 | -3.552894 | 1.483681  |
| 10 | C | 0.000000 | -2.898542 | 2.724280  |
| 11 | C | 0.000000 | -1.516336 | 2.790486  |
| 12 | C | 0.000000 | -0.729591 | 1.623211  |
| 13 | C | 0.000000 | 0.729591  | 1.623211  |
| 14 | C | 0.000000 | 1.516336  | 2.790486  |
| 15 | C | 0.000000 | 2.898542  | 2.724280  |
| 16 | C | 0.000000 | 3.552894  | 1.483681  |
| 17 | C | 0.000000 | 2.819928  | 0.311733  |
| 18 | C | 0.000000 | 1.423088  | 0.395267  |
| 19 | H | 0.000000 | -3.288597 | -0.662896 |
| 20 | H | 0.000000 | -4.635027 | 1.438690  |
| 21 | H | 0.000000 | -3.477928 | 3.639722  |
| 22 | H | 0.000000 | -1.035611 | 3.759536  |
| 23 | H | 0.000000 | 1.035611  | 3.759536  |
| 24 | H | 0.000000 | 3.477928  | 3.639722  |
| 25 | H | 0.000000 | 4.635027  | 1.438690  |
| 26 | H | 0.000000 | 3.288597  | -0.662896 |

Calculated at the B3LYP/6-311++G(d,p) level with  $C_{2v}$  symmetry . HF = -1117.5189847, Number of imaginary frequencies = 0

| Center<br>number | Atomic<br>symbol | Coordinates (Angstroms) |          |           |
|------------------|------------------|-------------------------|----------|-----------|
|                  |                  | X                       | Y        | Z         |
| 1                | S                | -1.733799               | 0.728422 | 8.284052  |
| 2                | N                | 0.119002                | 1.571724 | 10.088487 |
| 3                | N                | 0.483902                | 2.726392 | 10.560412 |
| 4                | N                | -0.224014               | 3.705419 | 10.001467 |
| 5                | N                | -1.086648               | 3.221760 | 9.158325  |
| 6                | C                | -0.893252               | 1.850220 | 9.184768  |
| 7                | C                | 1.504335                | 2.975483 | 11.492662 |
| 8                | C                | 2.218810                | 1.890186 | 11.999899 |
| 9                | C                | 3.216692                | 2.138407 | 12.920050 |
| 10               | C                | 3.491432                | 3.450002 | 13.324706 |
| 11               | C                | 2.770754                | 4.510581 | 12.811278 |
| 12               | C                | 1.745833                | 4.301358 | 11.875232 |
| 13               | C                | 0.943761                | 5.372882 | 11.289009 |
| 14               | C                | 1.093298                | 6.730983 | 11.610895 |
| 15               | C                | 0.298897                | 7.693200 | 11.018522 |
| 16               | C                | -0.678120               | 7.334344 | 10.082505 |

|    |   |           |          |           |
|----|---|-----------|----------|-----------|
| 17 | C | -0.858750 | 6.009812 | 9.740360  |
| 18 | C | -0.047236 | 5.054027 | 10.351507 |
| 19 | H | 1.973227  | 0.892938 | 11.659261 |
| 20 | H | 3.786550  | 1.313004 | 13.327352 |
| 21 | H | 4.276663  | 3.637270 | 14.046447 |
| 22 | H | 3.001877  | 5.515579 | 13.137836 |
| 23 | H | 1.840824  | 7.031989 | 12.332478 |
| 24 | H | 0.434291  | 8.734520 | 11.282886 |
| 25 | H | -1.296562 | 8.094912 | 9.623170  |
| 26 | H | -1.601564 | 5.688044 | 9.022347  |

Calculated at the M06-2X/6-311++G(d,p) level. HF = -1117.2023457 Number of imaginary frequencies = 0

| Center<br>number | Atomic<br>symbol | Coordinates (Angstroms) |          |           |
|------------------|------------------|-------------------------|----------|-----------|
|                  |                  | X                       | Y        | Z         |
| 1                | S                | -1.733637               | 0.728661 | 8.284735  |
| 2                | N                | 0.130855                | 1.573454 | 10.071088 |
| 3                | N                | 0.495986                | 2.727284 | 10.547744 |
| 4                | N                | -0.235938               | 3.704423 | 10.013728 |
| 5                | N                | -1.100773               | 3.216901 | 9.173197  |
| 6                | C                | -0.893608               | 1.849925 | 9.184441  |
| 7                | C                | 1.506730                | 2.974675 | 11.488631 |
| 8                | C                | 2.225125                | 1.895673 | 11.996453 |
| 9                | C                | 3.215780                | 2.143745 | 12.919943 |
| 10               | C                | 3.482000                | 3.452789 | 13.327979 |
| 11               | C                | 2.760039                | 4.508241 | 12.813908 |
| 12               | C                | 1.743742                | 4.298721 | 11.872241 |
| 13               | C                | 0.941257                | 5.369550 | 11.287288 |
| 14               | C                | 1.098144                | 6.725836 | 11.602558 |
| 15               | C                | 0.307094                | 7.688943 | 11.014251 |
| 16               | C                | -0.673972               | 7.333186 | 10.085826 |
| 17               | C                | -0.859716               | 6.011176 | 9.748927  |
| 18               | C                | -0.051001               | 5.052811 | 10.353747 |
| 19               | H                | 1.987383                | 0.898023 | 11.654265 |
| 20               | H                | 3.786891                | 1.319734 | 13.327905 |
| 21               | H                | 4.261997                | 3.642419 | 14.054510 |
| 22               | H                | 2.984909                | 5.512286 | 13.145652 |
| 23               | H                | 1.850704                | 7.026371 | 12.318141 |
| 24               | H                | 0.449121                | 8.729967 | 11.275596 |
| 25               | H                | -1.291599               | 8.095001 | 9.627817  |
| 26               | H                | -1.607309               | 5.693663 | 9.035340  |

Calculated at the CAM-B3LYP/6-311++G(d,p) level. HF = -1117.1342889. Number of imaginary frequencies = 0

| Center<br>number | Atomic<br>symbol | Coordinates (Angstroms) |          |           |
|------------------|------------------|-------------------------|----------|-----------|
|                  |                  | X                       | Y        | Z         |
| 1                | S                | -1.733857               | 0.729280 | 8.286121  |
| 2                | N                | 0.132200                | 1.572342 | 10.073220 |
| 3                | N                | 0.495788                | 2.727651 | 10.548109 |
| 4                | N                | -0.235536               | 3.704492 | 10.013878 |
| 5                | N                | -1.101687               | 3.219390 | 9.172977  |
| 6                | C                | -0.893305               | 1.850878 | 9.185799  |
| 7                | C                | 1.506780                | 2.974620 | 11.488603 |
| 8                | C                | 2.224841                | 1.892859 | 11.995153 |
| 9                | C                | 3.217007                | 2.140573 | 12.919838 |
| 10               | C                | 3.484286                | 3.450121 | 13.329540 |
| 11               | C                | 2.762109                | 4.508162 | 12.816143 |
| 12               | C                | 1.744613                | 4.299132 | 11.873492 |
| 13               | C                | 0.941432                | 5.370956 | 11.287946 |
| 14               | C                | 1.097891                | 6.728809 | 11.603137 |
| 15               | C                | 0.305075                | 7.691887 | 11.012821 |
| 16               | C                | -0.676143               | 7.334327 | 10.083508 |
| 17               | C                | -0.861577               | 6.010377 | 9.746577  |
| 18               | C                | -0.051045               | 5.052831 | 10.353705 |
| 19               | H                | 1.987749                | 0.894167 | 11.653037 |
| 20               | H                | 3.787739                | 1.314776 | 13.326608 |
| 21               | H                | 4.264886                | 3.639407 | 14.056590 |
| 22               | H                | 2.988362                | 5.512392 | 13.149699 |
| 23               | H                | 1.850481                | 7.031539 | 12.319302 |
| 24               | H                | 0.446829                | 8.733720 | 11.274074 |
| 25               | H                | -1.294934               | 8.095252 | 9.623903  |
| 26               | H                | -1.609780               | 5.693521 | 9.032131  |

Calculated at the  $\omega$ B97X-D/6-311++G(d,p) level. HF = -1117.2406949. Number of imaginary frequencies = 0

**Table S9.** The calculation of optimized geometry of BTC-S **3** in chloroform IEF-PCM.

| Center number | Atomic symbol | Coordinates (Angstroms) |           |           |
|---------------|---------------|-------------------------|-----------|-----------|
|               |               | X                       | Y         | Z         |
| 1             | S             | -4.509384               | 0.000285  | -0.000126 |
| 2             | N             | -2.021732               | -1.125417 | 0.000067  |
| 3             | N             | -0.788667               | -0.672277 | 0.000067  |
| 4             | N             | -0.788585               | 0.672399  | -0.000103 |
| 5             | N             | -2.021597               | 1.125687  | -0.000166 |
| 6             | C             | -2.814391               | 0.000183  | -0.000048 |
| 7             | C             | 0.395215                | -1.425523 | 0.000042  |
| 8             | C             | 0.310514                | -2.821482 | 0.000047  |
| 9             | C             | 1.483476                | -3.552977 | 0.000010  |
| 10            | C             | 2.722978                | -2.896282 | -0.000045 |
| 11            | C             | 2.790021                | -1.514180 | -0.000042 |
| 12            | C             | 1.621224                | -0.729401 | 0.000028  |
| 13            | C             | 1.621312                | 0.729232  | 0.000053  |
| 14            | C             | 2.790205                | 1.513869  | 0.000178  |
| 15            | C             | 2.723329                | 2.895979  | 0.000173  |
| 16            | C             | 1.483906                | 3.552824  | 0.000053  |
| 17            | C             | 0.310856                | 2.821471  | -0.000041 |
| 18            | C             | 0.395388                | 1.425502  | -0.000025 |
| 19            | H             | -0.659992               | -3.297416 | 0.000071  |
| 20            | H             | 1.440096                | -4.634899 | 0.000009  |
| 21            | H             | 3.638578                | -3.474859 | -0.000098 |
| 22            | H             | 3.759185                | -1.034818 | -0.000110 |
| 23            | H             | 3.759310                | 1.034390  | 0.000295  |
| 24            | H             | 3.638999                | 3.474445  | 0.000269  |
| 25            | H             | 1.440658                | 4.634751  | 0.000048  |
| 26            | H             | -0.659593               | 3.297523  | -0.000115 |

Calculated at the B3LYP/6-311++G(d,p) level in chloroform IEF-PCM. HF = -1117.5400429, Number of imaginary frequencies = 0

| Center number | Atomic symbol | Coordinates (Angstroms) |           |           |
|---------------|---------------|-------------------------|-----------|-----------|
|               |               | X                       | Y         | Z         |
| 1             | S             | -4.493664               | -0.000084 | 0.000130  |
| 2             | N             | -2.008302               | -1.117577 | -0.000571 |
| 3             | N             | -0.786662               | -0.662741 | -0.000396 |
| 4             | N             | -0.786684               | 0.662704  | 0.000470  |



|    |   |           |           |           |
|----|---|-----------|-----------|-----------|
| 5  | N | -2.008341 | 1.117498  | 0.000703  |
| 6  | C | -2.799105 | -0.000053 | 0.000077  |
| 7  | C | 0.398946  | -1.420136 | -0.000708 |
| 8  | C | 0.301790  | -2.810980 | -0.001459 |
| 9  | C | 1.470872  | -3.544119 | -0.002040 |
| 10 | C | 2.710094  | -2.892542 | -0.002025 |
| 11 | C | 2.783553  | -1.513164 | -0.001284 |
| 12 | C | 1.617966  | -0.730425 | -0.000541 |
| 13 | C | 1.617941  | 0.730472  | 0.000504  |
| 14 | C | 2.783500  | 1.513251  | 0.001193  |
| 15 | C | 2.709993  | 2.892627  | 0.001937  |
| 16 | C | 1.470749  | 3.544161  | 0.002011  |
| 17 | C | 0.301692  | 2.810981  | 0.001484  |
| 18 | C | 0.398897  | 1.420141  | 0.000728  |
| 19 | H | -0.673285 | -3.278893 | -0.001549 |
| 20 | H | 1.424539  | -4.625463 | -0.002574 |
| 21 | H | 3.622923  | -3.474770 | -0.002600 |
| 22 | H | 3.753632  | -1.035359 | -0.001442 |
| 23 | H | 3.753597  | 1.035480  | 0.001306  |
| 24 | H | 3.622802  | 3.474887  | 0.002470  |
| 25 | H | 1.424378  | 4.625503  | 0.002547  |
| 26 | H | -0.673399 | 3.278861  | 0.001619  |

Calculated at the M06-2X/6-311++G(d,p) level in chloroform IEF-PCM. HF = -1117.2249129. Number of imaginary frequencies = 0

| Center<br>number | Atomic<br>symbol | Coordinates (Angstroms) |           |           |
|------------------|------------------|-------------------------|-----------|-----------|
|                  |                  | X                       | Y         | Z         |
| 1                | S                | -0.664323               | 3.281071  | -0.000173 |
| 2                | N                | -2.010292               | -1.115232 | 0.000067  |
| 3                | N                | -0.786249               | -0.663435 | 0.000101  |
| 4                | N                | -0.786169               | 0.663552  | -0.000118 |
| 5                | N                | -2.010166               | 1.115489  | -0.000230 |
| 6                | C                | -2.799131               | 0.000177  | 0.000130  |
| 7                | C                | 0.397562                | -1.419884 | 0.000041  |
| 8                | C                | 0.307250                | -2.808766 | 0.000026  |
| 9                | C                | 1.474185                | -3.539333 | -0.000021 |
| 10               | C                | 2.709338                | -2.886467 | -0.000058 |
| 11               | C                | 2.778298                | -1.510011 | -0.000041 |
| 12               | C                | 1.614066                | -0.729855 | 0.000034  |
| 13               | C                | 1.614152                | 0.729694  | 0.000041  |

|    |   |           |           |           |
|----|---|-----------|-----------|-----------|
| 14 | C | 2.778475  | 1.509713  | 0.000150  |
| 15 | C | 2.709676  | 2.886178  | 0.000124  |
| 16 | C | 1.474599  | 3.539187  | -0.000003 |
| 17 | C | 0.307578  | 2.808757  | -0.000090 |
| 18 | C | 0.397728  | 1.419864  | -0.000046 |
| 19 | H | -0.664707 | -3.280967 | 0.000044  |
| 20 | H | 1.429813  | -4.620546 | -0.000041 |
| 21 | H | 3.623586  | -3.465983 | -0.000114 |
| 22 | H | 3.747228  | -1.031555 | -0.000098 |
| 23 | H | 3.747349  | 1.031144  | 0.000263  |
| 24 | H | 3.623991  | 3.465587  | 0.000208  |
| 25 | H | 1.430353  | 4.620405  | -0.000023 |
| 26 | H | -0.664323 | 3.281071  | -0.000173 |

Calculated at the CAM-B3LYP/6-311++G(d,p) level in chloroform IEF-PCM. HF = -1117.1572301. Number of imaginary frequencies = 0

| Center<br>number | Atomic<br>symbol | Coordinates (Angstroms) |           |           |
|------------------|------------------|-------------------------|-----------|-----------|
|                  |                  | X                       | Y         | Z         |
| 1                | S                | -4.490578               | 0.000224  | -0.001234 |
| 2                | N                | -2.008954               | -1.117731 | -0.000068 |
| 3                | N                | -0.785872               | -0.663250 | 0.000078  |
| 4                | N                | -0.785806               | 0.663349  | -0.000339 |
| 5                | N                | -2.008848               | 1.117945  | -0.000630 |
| 6                | C                | -2.797536               | 0.000147  | 0.000157  |
| 7                | C                | 0.397495                | -1.419862 | 0.000009  |
| 8                | C                | 0.304020                | -2.810088 | -0.000076 |
| 9                | C                | 1.471957                | -3.542483 | -0.000111 |
| 10               | C                | 2.709060                | -2.890680 | -0.000079 |
| 11               | C                | 2.780423                | -1.512441 | -0.000001 |
| 12               | C                | 1.615551                | -0.730528 | 0.000093  |
| 13               | C                | 1.615622                | 0.730395  | 0.000118  |
| 14               | C                | 2.780571                | 1.512193  | 0.000406  |
| 15               | C                | 2.709342                | 2.890439  | 0.000317  |
| 16               | C                | 1.472302                | 3.542362  | -0.000053 |
| 17               | C                | 0.304294                | 2.810082  | -0.000289 |
| 18               | C                | 0.397633                | 1.419846  | -0.000156 |
| 19               | H                | -0.668613               | -3.282760 | -0.000124 |
| 20               | H                | 1.425347                | -4.624266 | -0.000188 |
| 21               | H                | 3.623480                | -3.471174 | -0.000147 |
| 22               | H                | 3.751263                | -1.035692 | -0.000041 |
| 23               | H                | 3.751364                | 1.035350  | 0.000723  |

|           |   |           |          |           |
|-----------|---|-----------|----------|-----------|
| <b>24</b> | H | 3.623819  | 3.470845 | 0.000538  |
| <b>25</b> | H | 1.425798  | 4.624151 | -0.000132 |
| <b>26</b> | H | -0.668292 | 3.282848 | -0.000543 |

Calculated at the  $\omega$ B97X-D/6-311++G(d,p) level in chloroform IEF-PCM. HF = -1117.2635142. Number of imaginary frequencies = 0

**Table S10.** The calculation of optimized geometry of dehydrodithizone (**DD**) in gas phase.

| Center<br>number | Atomic<br>symbol | Coordinates (Angstroms) |           |           |
|------------------|------------------|-------------------------|-----------|-----------|
|                  |                  | X                       | Y         | Z         |
| 1                | S                | 0.000000                | 0.000000  | -4.463581 |
| 2                | C                | 0.000000                | 0.000000  | -2.791206 |
| 3                | N                | 0.032025                | 1.124694  | -1.973847 |
| 4                | N                | 0.022690                | 0.673629  | -0.743303 |
| 5                | C                | 0.116020                | 1.529641  | 0.404546  |
| 6                | C                | 1.087887                | 1.301201  | 1.376164  |
| 7                | C                | 1.171649                | 2.174821  | 2.456690  |
| 8                | C                | 0.307493                | 3.264954  | 2.548697  |
| 9                | C                | -0.643542               | 3.490547  | 1.553652  |
| 10               | C                | -0.745428               | 2.622740  | 0.471060  |
| 11               | H                | 1.771500                | 0.466896  | 1.286434  |
| 12               | H                | 1.924157                | 2.009721  | 3.218413  |
| 13               | H                | 0.382897                | 3.944917  | 3.389088  |
| 14               | H                | -1.306441               | 4.345171  | 1.616261  |
| 15               | H                | -1.463752               | 2.787975  | -0.321647 |
| 16               | N                | -0.032025               | -1.124694 | -1.973847 |
| 17               | N                | -0.022690               | -0.673629 | -0.743303 |
| 18               | C                | -0.116020               | -1.529641 | 0.404546  |
| 19               | C                | -1.087887               | -1.301201 | 1.376164  |
| 20               | C                | -1.171649               | -2.174821 | 2.456690  |
| 21               | C                | -0.307493               | -3.264954 | 2.548697  |
| 22               | C                | 0.643542                | -3.490547 | 1.553652  |
| 23               | C                | 0.745428                | -2.622740 | 0.471060  |
| 24               | H                | -1.771500               | -0.466896 | 1.286434  |
| 25               | H                | -1.924157               | -2.009721 | 3.218413  |
| 26               | H                | -0.382897               | -3.944917 | 3.389088  |
| 27               | H                | 1.306441                | -4.345171 | 1.616261  |
| 28               | H                | 1.463752                | -2.787975 | -0.321647 |

Calculated at the B3LYP/6-311++G(d,p) level. HF = -1118.6980846, Number of imaginary frequencies = 0

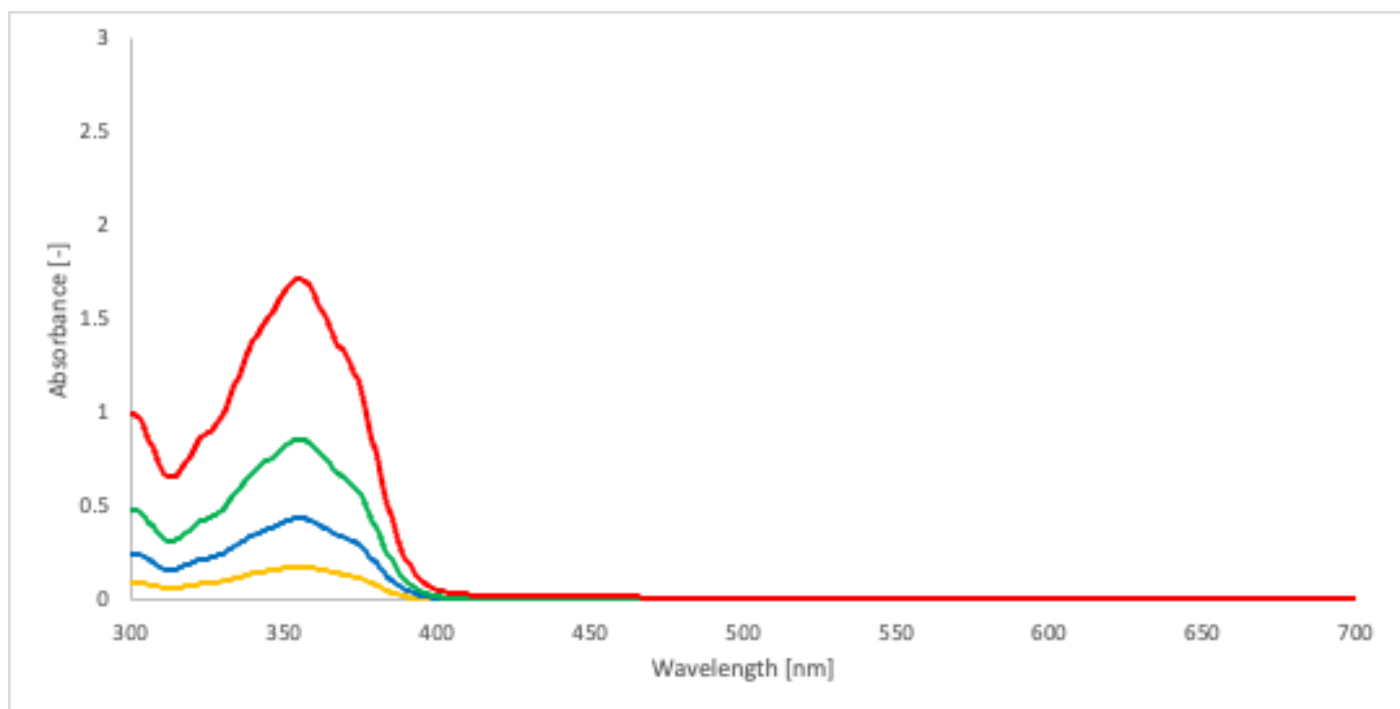

|                    |             |                  |             |             |
|--------------------|-------------|------------------|-------------|-------------|
| Caribration        | exp.211     |                  |             |             |
| Mol No.            | 15          | Sovent           | MeCN        |             |
| Wavelength [nm]    | 337         | Temperature [°C] | 20          |             |
| Caribration        | p_1         | p_5              | p_8         | p_10        |
| Concentration [mM] | 0.020553458 | 0.051383644      | 0.102767288 | 0.205534576 |
| Absorbance [-]     | 0.132       | 0.323            | 0.631       | 1.273       |

|             |             |
|-------------|-------------|
| a           | b           |
| 6.163181957 | 0.003879518 |

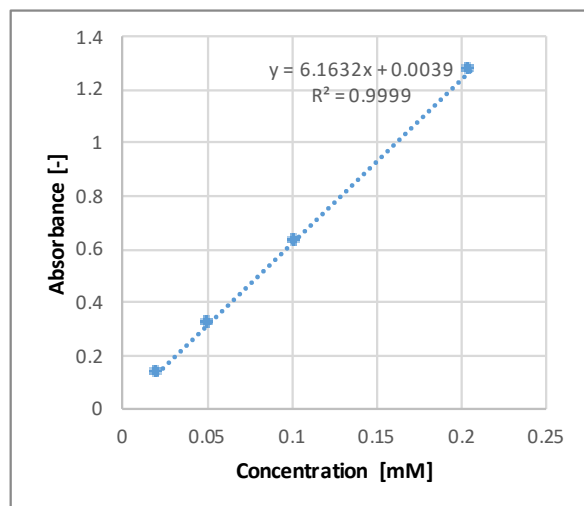

|                    |                |                |
|--------------------|----------------|----------------|
| Observed           | NaOH treatment | HBF4 treatment |
| Absorbance [-]     | 0.925          | 0.945          |
| Concentration [mM] | 0.149455344    | 0.152700421    |

**Figure S14.** UV-Vis spectra (top) and calibration curve (bottom) of  $5\bullet\text{H}^+$  in acetonitrile. Concentration [mM] = 0.21 (red), 0.10 (green), 0.051 (blue) and 0.021 (yellow).

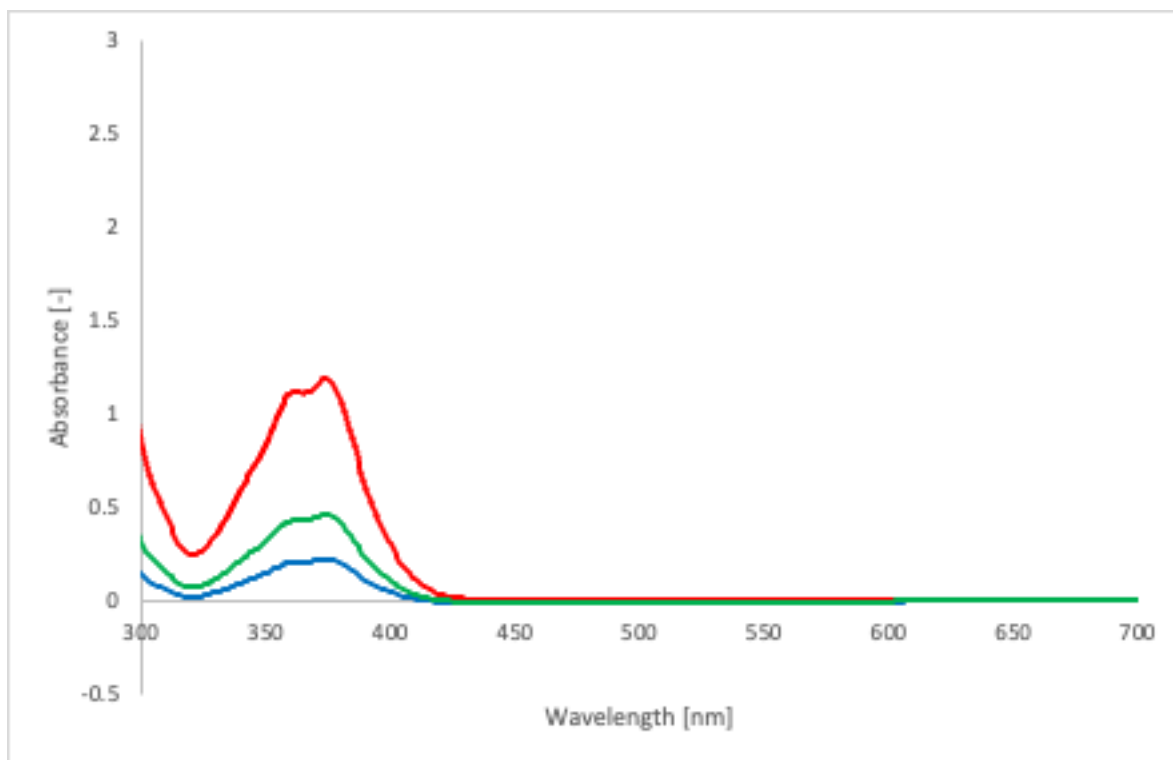

|                    |             |                  |             |
|--------------------|-------------|------------------|-------------|
| Caribration        | exp.585     |                  |             |
| Mol No.            | 47          | Sovent           | MeCN        |
| Wavelength [nm]    | 345         | Temperature [°C] | 20          |
| Caribration        | p_1         | p_4              | p_5         |
| Concentration [mM] | 0.126592294 | 0.025318459      | 0.050636917 |
| Absorbance [-]     | 0.706       | 0.12             | 0.265       |

|             |              |
|-------------|--------------|
| a           | b            |
| 5.790849519 | -0.027307692 |

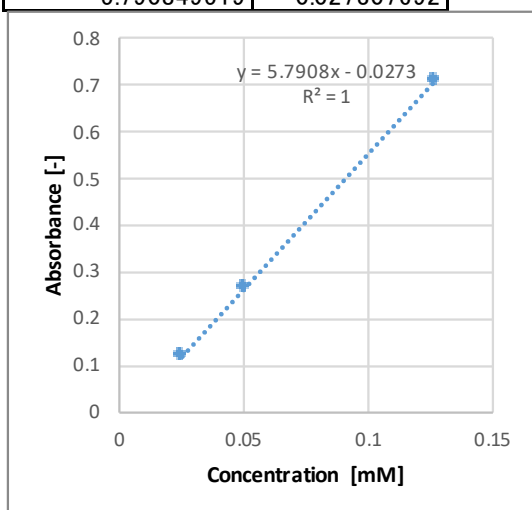

|                    |                |                |
|--------------------|----------------|----------------|
| Observed           | NaOH treatment | HBF4 treatment |
| Absorbance [-]     | 0.581          | 0.562          |
| Concentration [mM] | 0.105046365    | 0.101765327    |

**Figure S15.** UV-Vis spectra (top) and calibration curve (bottom) of  $6\bullet\text{H}^+$  in acetonitrile. Concentration [mM] = 0.13 (red), 0.051 (green), and 0.025 (blue).
